# Supplementary material for: The impact of core self-evaluation on school adaptation of high school students after their return to school during the COVID-19 pandemic: the parallel mediation of positive and negative coping styles
Source: PeerJ. 2023 Oct 31;11:e15871. doi: 10.7717/peerj.15871 (PMC10624169; doi:10.7717/peerj.15871)
Supplement: Supplemental Information 1 [file peerj-11-15871-s001.xlsx]

## Sheet: Sheet1
GENDER	AGE	CSE1	CSE2	CSE3	CSE4	CSE5	CSE6	CSE7	CSE8	CSE9	CSE10	CSE	SA1	SA2	SA3	SA4	SA5	SA6	SA7	SA8	SA9	SA10	SA11	SA12	SA13	SA14	SA15	SA16	SA17	SA18	SA19	SA20	SA21	SA22	SA23	SA24	SA25	SA26	SA27	School a	Peer r	Tchstu r	Academic a	Conwentional a	SA	Coping1	Coping2	Coping3	Coping4
2	16	5	4	1	2	1	2	2	2	2	2	23	2	3	3	5	5	3	5	5	5	2	2	5	5	3	3	3	5	5	3	5	5	5	3	5	5	5	4	23	30	21	15	17	106	3	2	3	3
2	15	4	4	4	4	4	4	4	4	4	4	40	4	4	4	4	4	4	2	4	4	2	4	4	4	4	4	4	4	4	4	4	4	4	4	4	4	4	4	22	24	20	20	14	100	1	1	2	2
2	16	4	2	2	3	2	3	4	4	4	3	31	1	3	2	5	4	3	5	5	5	4	3	4	5	4	3	3	5	5	5	5	4	5	3	5	5	5	5	27	30	19	13	19	108	2	3	3	2
1	16	3	3	3	3	3	3	3	3	3	3	30	2	4	2	3	3	3	3	3	3	3	3	3	3	3	4	4	4	4	3	5	5	4	2	5	4	4	4	19	21	19	14	16	89	2	2	2	2
1	16	3	3	2	4	4	4	4	4	4	4	36	4	4	4	4	5	4	4	4	4	4	4	4	4	4	4	4	4	4	4	4	4	4	4	4	4	4	4	24	24	20	21	16	105	3	3	3	3
1	16	5	3	3	3	3	3	3	3	3	3	32	3	3	3	3	3	3	3	3	3	3	3	3	3	3	3	3	3	3	3	3	3	3	3	3	3	3	3	18	18	15	15	12	78	1	1	1	1
2	16	3	3	3	2	1	3	2	3	4	2	26	4	4	4	5	5	5	3	5	5	5	2	4	5	4	3	3	5	5	2	5	2	5	4	5	5	5	5	23	30	20	18	20	111	0	1	0	0
1	16	1	5	5	1	5	1	5	5	1	5	34	4	4	2	4	2	4	4	4	4	4	4	4	4	2	4	2	4	4	4	4	4	4	2	4	4	4	4	20	24	20	14	16	94	0	0	0	0
2	16	3	4	4	3	4	2	4	4	3	4	35	3	3	3	5	3	3	5	4	4	1	4	4	4	4	3	3	4	4	3	5	3	4	3	3	3	3	3	22	23	16	16	14	91	2	1	0	0
1	15	3	3	3	3	3	3	3	3	3	3	30	3	3	3	3	3	3	3	3	3	3	4	4	4	4	3	3	3	3	3	4	4	4	3	3	3	3	3	19	20	17	16	13	85	2	2	2	2
1	16	4	3	3	3	3	4	3	3	4	3	33	3	4	4	4	4	3	3	1	1	1	1	1	1	5	4	4	1	1	1	1	1	1	2	3	2	2	3	15	7	11	16	9	58	2	2	2	1
2	16	4	4	5	2	4	3	4	4	2	4	36	5	5	4	5	5	5	5	5	5	5	5	5	5	5	5	1	5	5	5	5	5	4	5	5	5	5	5	30	29	25	20	20	124	2	2	3	2
2	17	3	4	4	3	3	4	4	3	4	4	36	4	4	2	5	4	4	5	5	5	5	4	5	5	4	4	3	5	4	4	5	4	5	4	5	4	5	5	26	30	21	17	20	114	2	3	2	2
2	16	2	4	4	2	2	2	4	2	3	4	29	1	2	2	5	4	4	4	5	5	5	4	4	5	2	2	2	5	5	5	5	4	5	4	5	2	5	5	25	30	16	13	20	104	2	3	2	2
2	17	2	2	3	2	2	4	2	2	3	2	24	1	3	2	5	4	3	4	5	5	2	2	4	5	2	2	3	5	2	2	5	2	5	3	5	4	5	3	16	30	16	12	17	91	0	2	0	1
1	16	2	4	4	3	3	4	4	4	4	3	35	4	4	2	5	4	5	5	5	5	4	5	5	5	4	5	4	5	5	5	5	5	5	4	5	5	5	5	28	30	24	19	19	120	3	3	3	3
1	17	2	1	3	4	2	4	4	3	4	3	30	3	1	1	5	4	3	5	5	5	2	3	3	5	3	3	3	5	3	2	5	3	5	3	5	3	5	3	19	30	13	14	17	93	0	0	2	1
1	17	1	5	5	1	5	1	5	5	1	5	34	5	5	1	5	1	5	5	5	5	5	5	5	5	1	5	1	5	5	5	5	5	5	1	5	5	5	5	22	30	25	13	20	110	0	0	0	0
2	16	5	4	4	1	1	3	3	1	3	3	28	3	1	1	1	3	3	5	1	5	2	1	2	5	3	3	1	5	3	2	5	2	5	3	5	3	5	3	19	26	11	9	13	78	2	1	2	3
2	16	4	4	4	3	4	4	4	4	4	4	39	4	4	4	4	4	5	5	5	5	5	5	5	5	4	5	4	5	5	5	5	5	5	4	5	5	5	5	28	30	24	21	19	122	2	2	2	3
2	16	4	4	5	3	3	4	5	5	4	5	42	3	4	3	5	4	3	3	5	4	1	2	3	5	2	3	3	5	4	3	5	5	5	3	5	4	5	3	18	29	19	15	16	97	0	1	3	3
1	16	4	4	4	4	4	2	4	4	4	2	36	4	4	2	5	4	4	5	3	3	4	5	4	3	1	2	4	4	4	5	5	5	5	1	5	5	5	5	21	23	22	19	19	104	3	3	3	3
1	15	5	1	1	5	1	5	1	1	2	1	23	4	2	1	4	4	4	5	5	4	2	3	4	5	3	3	3	5	4	4	5	4	5	4	4	2	5	4	24	29	16	15	15	99	2	1	3	2
1	16	5	4	5	5	5	5	5	5	5	5	49	4	4	2	5	5	5	5	5	5	5	5	5	5	4	5	4	5	5	5	5	5	5	4	5	5	5	5	28	30	24	20	20	122	2	2	2	3
2	17	3	4	4	3	4	4	4	4	3	4	37	3	3	3	4	4	4	4	4	4	4	4	4	4	4	4	4	4	4	4	4	4	4	4	4	4	4	4	24	24	19	18	16	101	2	2	2	2
2	16	5	4	4	3	3	5	4	4	2	4	38	4	2	4	4	3	4	1	4	4	1	4	4	3	2	1	3	4	4	1	4	4	4	5	4	4	4	4	17	23	18	18	13	89	3	0	0	0
1	17	4	1	3	3	4	3	3	2	4	2	29	4	2	4	5	5	2	5	5	3	2	5	5	5	2	5	2	5	3	5	5	2	5	3	5	5	3	4	22	26	16	20	17	101	2	2	3	3
1	14	5	5	5	5	5	5	5	5	5	5	50	5	5	5	5	5	5	5	5	5	5	5	5	5	5	5	5	5	5	5	5	5	5	5	5	5	5	5	30	30	25	25	20	130	3	3	3	3
2	16	4	5	5	3	2	3	3	3	3	4	35	2	4	3	5	5	5	5	5	5	5	5	5	5	4	5	3	5	5	5	5	5	5	5	5	5	5	5	29	30	24	18	20	121	3	3	3	3
2	16	4	4	3	4	4	4	4	4	4	4	39	4	2	3	5	4	4	5	5	5	5	5	4	5	4	5	3	5	5	5	5	4	5	4	5	5	5	5	28	30	19	19	20	116	2	3	2	2
2	17	3	1	1	3	2	2	2	2	3	3	22	3	2	3	5	3	4	5	3	2	3	2	3	4	2	3	2	3	3	3	4	2	4	2	5	4	4	5	20	20	15	13	17	85	2	3	2	2
2	17	3	4	4	3	3	4	4	3	4	4	36	3	3	4	4	4	4	5	5	5	5	5	5	5	5	5	5	5	5	5	5	4	5	5	5	5	5	5	30	30	21	21	19	121	2	1	3	3
2	16	4	4	4	4	4	4	4	4	4	2	38	4	4	4	5	5	4	5	5	5	2	5	5	5	4	4	4	5	4	3	5	5	5	2	5	5	5	5	23	30	23	22	17	115	2	3	2	3
1	16	5	5	3	2	3	3	3	3	3	3	33	3	3	4	3	3	3	5	5	5	2	3	4	5	4	4	3	5	4	3	3	3	5	3	3	3	5	3	22	30	16	16	11	95	1	1	2	3
1	16	4	2	2	3	2	4	2	3	3	1	26	2	2	2	2	3	2	3	3	4	1	1	1	2	3	1	1	2	2	2	3	1	1	1	4	3	2	1	12	14	9	9	10	54	1	1	1	1
1	16	3	4	4	4	3	5	4	5	5	5	42	2	2	2	5	5	3	5	5	5	5	5	5	5	5	5	3	5	5	4	5	4	5	4	5	5	5	5	28	30	19	17	20	114	3	2	2	2
2	16	4	4	4	4	2	2	4	4	4	2	34	5	2	4	5	4	5	5	4	5	5	5	5	5	4	5	4	5	5	5	5	5	5	4	5	5	5	5	28	29	22	22	20	121	1	1	1	1
1	16	3	2	3	2	3	3	3	3	3	3	28	3	3	3	3	4	3	4	4	4	3	3	3	4	3	3	3	4	4	3	3	4	5	3	3	4	4	3	20	25	17	16	12	90	1	2	2	2
2	16	4	3	3	3	3	3	3	3	3	3	31	3	3	2	4	2	4	4	3	3	3	4	4	3	3	3	3	3	3	3	3	3	3	3	3	3	3	3	19	18	17	14	13	81	2	1	1	1
1	16	1	5	1	3	1	1	1	1	2	1	17	1	1	5	4	5	1	1	5	5	1	1	1	1	5	1	1	5	5	1	5	2	5	5	5	5	5	1	18	26	10	13	15	82	3	3	3	3
1	15	2	4	4	2	4	2	4	4	2	4	32	5	5	1	5	1	4	4	4	4	4	4	4	4	2	4	2	4	4	4	4	4	4	2	4	4	4	4	20	24	21	13	17	95	3	3	3	3
1	16	3	5	4	4	4	4	3	3	4	5	39	4	4	4	5	4	5	5	5	5	5	5	5	5	5	5	5	5	5	5	5	5	5	5	5	5	5	5	30	30	24	22	20	126	2	2	3	3
2	16	4	4	4	2	4	4	3	2	2	3	32	4	2	4	5	5	4	5	5	5	5	5	5	5	4	5	4	5	5	5	5	5	5	5	5	5	5	5	29	30	21	22	20	122	2	2	3	3
2	16	3	3	5	4	3	5	5	3	4	5	40	2	1	2	5	3	3	2	5	3	3	3	3	5	3	5	3	5	5	2	5	5	5	3	5	4	5	5	20	28	16	13	18	95	1	3	1	0
2	17	3	5	4	2	3	3	4	4	2	4	34	3	3	2	5	2	4	2	4	5	5	4	4	4	3	5	3	5	5	5	5	5	5	2	5	5	5	5	22	28	21	14	20	105	1	2	2	2
2	16	4	4	4	3	3	3	3	3	4	4	35	4	4	2	5	3	4	4	5	5	2	3	4	4	3	4	3	5	5	3	4	3	5	3	5	4	4	4	22	28	19	15	16	100	1	2	2	2
1	16	3	3	3	3	3	3	3	3	3	4	31	4	3	3	4	4	4	4	4	4	4	4	4	4	3	4	3	4	4	4	4	4	4	3	4	3	4	4	22	24	18	18	16	98	1	1	2	2
2	17	4	4	4	4	4	3	4	3	4	4	38	3	3	3	3	3	3	4	4	4	4	3	5	5	4	5	1	5	5	4	4	4	5	2	5	4	4	4	23	27	19	13	16	98	1	3	3	3
1	17	4	5	5	4	5	4	5	5	4	5	46	4	5	4	5	4	5	5	5	5	5	4	5	5	4	4	4	5	2	5	5	5	5	4	5	5	5	5	25	30	25	20	20	120	2	2	2	2
1	16	4	2	3	3	3	4	4	4	4	4	35	3	4	2	4	4	4	4	5	5	2	4	4	5	4	5	4	5	5	5	5	5	5	4	3	5	5	5	27	30	22	17	14	110	1	3	2	2
2	18	4	3	5	3	3	4	4	4	4	4	38	4	4	2	5	4	4	5	5	5	5	5	5	5	4	5	4	5	4	4	4	4	4	4	4	5	5	5	26	29	22	19	18	114	1	1	1	1
2	17	3	2	2	1	1	3	3	2	3	2	22	1	1	2	5	3	3	2	5	3	3	1	3	5	4	3	2	5	3	1	5	5	5	3	5	5	5	5	18	28	17	9	18	90	1	3	2	0
2	16	3	2	2	2	2	2	2	2	2	3	22	2	2	2	5	3	4	5	5	5	2	3	4	4	3	5	2	5	5	3	4	2	5	3	5	5	5	5	24	29	17	12	16	98	2	3	3	3
1	17	5	1	1	5	5	5	1	5	5	5	38	5	1	5	5	5	5	5	5	5	1	5	1	5	5	5	5	5	5	5	5	5	5	5	5	1	5	5	30	30	13	25	16	114	3	3	3	3
1	16	2	4	4	2	4	2	4	4	2	4	32	4	4	2	4	2	4	4	4	4	4	4	4	4	2	4	2	4	4	4	4	4	4	2	4	4	4	4	20	24	20	14	16	94	1	1	1	1
2	17	4	2	4	4	3	5	2	2	5	5	36	4	2	4	5	5	2	3	5	4	2	3	4	5	4	3	4	5	4	3	5	5	5	4	5	5	5	4	22	29	18	20	17	106	2	2	3	2
2	16	5	4	4	4	4	5	4	4	4	4	42	4	4	4	4	4	5	5	5	5	4	5	5	5	4	5	2	5	5	5	5	5	5	4	5	5	5	5	28	30	24	19	18	119	2	3	3	3
2	17	4	2	2	2	2	4	2	2	2	3	25	2	2	2	5	4	5	5	5	3	4	4	4	3	3	4	4	5	4	4	5	4	5	5	5	3	5	5	26	26	18	16	19	105	3	3	3	2
2	16	4	4	3	3	3	3	4	4	4	4	36	4	4	2	4	4	4	4	4	4	4	4	4	2	4	4	3	4	4	4	4	4	4	4	4	2	4	4	24	22	18	17	16	97	1	1	1	2
2	17	3	4	3	3	3	2	3	3	3	3	30	3	4	4	5	4	4	4	5	5	5	3	4	4	4	5	3	5	5	4	5	5	5	3	5	4	5	5	25	29	21	17	20	112	2	2	3	2
1	17	1	2	4	4	4	4	4	2	2	3	30	5	4	5	5	2	5	5	4	5	1	1	4	5	3	2	3	5	4	2	5	5	5	4	5	3	5	3	21	29	21	16	16	103	1	2	1	0
2	17	2	3	2	4	3	3	4	4	2	2	29	4	3	3	5	5	3	5	3	5	5	3	4	3	4	5	3	5	5	5	5	5	5	4	5	5	5	5	28	26	20	18	20	112	2	3	3	3
1	17	2	5	2	4	4	5	5	2	5	5	39	4	4	4	5	4	2	5	5	5	4	5	5	5	4	5	3	5	5	5	3	5	5	4	5	5	5	5	28	30	21	20	17	116	1	2	3	1
2	16	4	4	3	3	4	5	3	2	5	4	37	3	2	2	5	4	4	2	5	5	2	2	3	4	2	3	2	5	4	1	5	3	4	3	5	5	4	3	15	27	17	13	17	89	0	1	1	2
1	15	4	4	3	3	4	5	3	2	5	4	37	3	4	3	4	2	3	4	5	5	5	5	5	5	4	5	4	5	5	5	5	5	5	5	5	5	5	5	28	30	22	17	19	116	1	1	1	2
1	16	2	1	4	2	1	3	3	1	4	2	23	2	2	2	4	2	2	2	5	5	1	1	4	5	2	1	1	5	2	1	5	2	5	1	5	5	5	2	10	30	15	8	15	78	2	1	2	2
1	17	3	4	4	4	4	4	5	4	4	5	41	4	2	2	5	5	4	5	5	5	5	5	3	5	4	5	3	5	5	5	5	4	5	4	5	5	5	5	28	30	18	19	20	115	1	1	2	2
1	17	4	3	4	4	3	3	4	3	3	4	35	3	4	4	4	4	5	5	5	5	5	5	5	5	4	5	4	5	5	5	5	5	5	4	5	5	5	5	28	30	24	20	19	121	3	1	1	2
2	16	3	3	2	3	2	3	3	2	3	3	27	4	4	3	5	4	4	5	5	5	2	4	4	5	4	4	3	5	4	3	5	5	5	4	5	5	5	5	25	30	22	18	17	112	2	2	2	2
1	17	4	3	1	4	2	3	3	3	3	3	29	4	3	3	5	5	3	3	4	4	2	3	3	4	3	3	3	5	5	3	5	3	5	3	5	5	5	5	22	27	17	18	17	101	1	2	2	2
2	16	4	4	4	2	2	4	4	4	2	4	34	4	4	4	4	4	4	4	4	4	4	4	4	4	2	4	2	4	4	2	4	4	4	4	4	4	4	4	20	24	20	18	16	98	3	3	3	3
1	15	3	3	3	3	3	3	3	3	3	3	30	4	4	4	5	4	5	5	5	5	4	5	5	5	4	5	4	5	5	5	5	5	5	4	5	5	5	5	28	30	24	21	19	122	2	2	2	2
2	16	4	3	4	2	2	3	4	3	4	4	33	4	4	4	4	4	4	3	4	4	2	4	4	4	3	4	3	4	4	4	4	4	4	3	4	4	4	4	21	24	20	19	14	98	1	3	1	0
2	17	3	4	4	3	2	3	3	3	4	4	33	3	4	2	4	3	2	3	4	4	3	3	4	4	3	2	2	4	3	3	4	4	4	2	4	3	4	3	17	24	17	13	15	86	1	2	1	2
2	16	3	3	4	3	4	3	2	4	3	3	32	3	3	2	5	3	3	4	5	5	4	3	3	5	3	3	2	5	3	2	5	3	5	1	5	4	5	3	16	30	16	13	19	94	1	2	1	2
1	16	5	4	4	3	4	5	4	4	4	5	42	4	3	3	5	4	5	5	5	5	3	4	4	5	2	4	4	5	5	4	5	5	5	4	5	4	5	5	25	30	21	19	18	113	2	2	2	2
2	17	4	4	3	3	2	4	4	4	3	5	36	4	4	3	5	4	4	5	4	5	3	5	4	5	4	5	4	5	4	5	5	4	5	4	5	5	5	5	27	29	21	20	18	115	1	2	1	1
1	16	3	3	3	3	3	3	3	3	3	3	30	4	4	2	4	3	4	4	4	4	4	4	3	2	3	3	3	3	3	3	3	3	3	3	3	3	3	3	19	19	17	16	14	85	2	2	2	2
2	16	5	4	2	3	4	4	4	4	4	4	38	4	4	4	5	5	4	5	5	5	5	5	5	5	4	5	3	5	5	5	5	5	5	4	5	5	5	5	28	30	23	21	20	122	3	3	2	2
2	16	3	3	2	2	2	1	2	2	3	2	22	2	2	1	5	4	5	5	5	5	2	4	3	5	2	4	1	5	5	5	5	2	5	2	5	4	5	3	22	30	16	12	17	97	1	0	1	1
1	16	4	5	5	4	5	2	5	4	4	5	43	5	4	2	5	4	5	5	5	5	5	5	5	5	4	4	2	5	5	5	5	5	5	4	5	5	5	5	28	30	24	18	20	120	2	1	3	2
1	17	5	5	5	5	5	5	5	5	5	5	50	5	5	5	5	5	5	5	5	5	5	5	5	5	5	5	5	5	5	5	5	5	5	5	5	5	5	5	30	30	25	25	20	130	3	3	3	3
1	16	3	2	3	3	4	3	4	1	3	4	30	3	2	1	5	3	3	5	5	5	2	3	4	2	3	4	3	5	3	2	5	4	5	3	5	4	5	5	21	27	17	13	17	95	2	3	1	0
1	16	1	5	5	3	4	3	5	5	4	5	40	4	5	4	5	5	5	5	5	5	5	5	5	5	4	5	4	5	5	5	5	5	5	4	2	5	5	5	28	30	25	22	17	122	2	1	3	3
1	16	4	4	3	4	4	5	5	4	5	5	43	5	5	4	5	5	5	5	5	5	5	5	5	5	5	5	4	5	5	5	5	5	5	4	5	5	5	5	29	30	25	23	20	127	1	2	2	3
1	16	4	2	2	4	2	2	2	4	4	2	28	4	4	2	5	4	4	5	5	5	2	4	5	5	4	5	4	5	4	4	5	5	5	4	5	5	5	5	26	30	23	18	17	114	2	2	2	2
1	16	5	5	5	4	2	4	5	5	5	2	42	2	5	4	3	4	5	5	5	5	5	5	5	5	5	5	3	5	5	5	5	5	5	4	5	5	5	5	29	30	25	18	18	120	3	3	3	3
2	16	4	4	4	3	3	4	4	4	5	4	39	3	4	2	5	5	3	4	3	5	2	4	5	4	4	4	3	5	4	2	5	4	4	3	5	5	4	4	21	25	21	17	17	101	2	3	1	1
2	17	3	2	2	3	2	2	2	2	3	2	23	2	3	2	4	4	5	2	4	5	2	3	4	3	2	3	2	5	4	2	4	3	5	2	5	4	4	3	15	26	19	13	15	88	1	2	2	1
2	15	5	3	3	5	5	5	3	3	3	3	38	5	5	1	5	1	5	5	5	5	5	5	5	5	1	5	3	5	5	5	5	5	5	1	5	5	5	5	22	30	25	15	20	112	3	3	3	3
2	16	4	3	4	3	4	4	4	4	3	4	37	4	3	4	5	4	4	5	5	5	4	5	5	5	4	5	3	5	4	5	5	4	5	4	5	4	5	5	27	30	20	20	19	116	2	2	2	3
2	16	3	3	3	2	2	3	3	2	3	3	27	2	2	2	4	3	3	5	3	3	3	3	2	5	2	2	3	4	3	3	5	3	3	3	5	3	5	4	20	23	13	13	17	86	1	1	1	1
1	15	5	5	5	5	5	1	5	5	5	5	46	5	5	2	5	2	5	5	5	5	2	5	5	5	4	5	3	5	5	5	3	5	5	2	5	5	5	5	26	30	25	17	15	113	3	3	3	3
1	16	5	3	4	4	4	4	3	3	3	4	37	3	3	3	4	4	4	5	5	3	3	3	4	5	3	3	3	3	3	3	4	3	5	4	4	4	4	4	22	25	18	16	15	96	2	3	3	3
1	16	4	2	2	4	2	3	4	3	4	4	32	2	4	3	4	3	4	5	4	4	2	2	4	4	3	3	3	4	2	1	2	3	5	4	5	4	4	3	18	25	19	13	13	88	2	2	2	2
2	17	4	5	4	4	4	5	5	3	4	5	43	4	5	4	5	5	5	5	5	5	5	5	5	5	4	5	4	5	5	5	5	5	5	5	5	5	5	5	29	30	25	22	20	126	3	2	3	3
2	16	4	4	2	3	3	3	3	2	3	4	31	3	2	2	5	4	4	5	4	5	2	4	2	4	4	5	2	5	4	2	5	4	5	2	5	4	5	2	19	28	16	15	17	95	1	3	1	1
1	17	2	1	2	2	1	2	2	2	4	1	19	2	4	4	4	4	2	5	3	2	3	3	4	4	2	3	2	3	3	1	2	4	4	2	5	5	3	4	17	19	19	15	14	84	1	3	1	1
2	17	4	3	4	4	3	4	3	2	4	5	36	4	4	4	5	5	5	5	5	5	5	5	5	5	4	5	4	5	5	5	5	5	5	4	5	5	5	5	28	30	24	22	20	124	2	2	1	1
2	16	4	3	3	2	2	3	2	2	4	3	28	4	2	3	4	4	3	5	5	5	3	4	4	5	4	3	3	5	5	5	5	4	5	3	5	5	5	5	27	30	18	18	17	110	1	3	2	2
1	16	4	4	2	4	3	4	3	2	5	3	34	3	4	4	5	5	5	5	5	5	5	5	5	5	3	5	1	5	5	5	5	5	5	2	5	5	5	5	25	30	24	18	20	117	3	3	3	3
1	16	4	2	2	2	3	3	3	2	5	4	30	2	5	2	5	3	5	5	5	5	2	2	5	5	2	4	2	5	5	5	2	5	5	2	5	4	5	5	24	30	24	11	14	103	2	2	2	2
2	16	3	3	2	4	2	2	3	3	3	2	27	4	3	3	5	4	3	3	4	4	3	3	3	5	3	4	3	4	4	3	5	3	5	3	5	3	4	4	20	26	15	17	18	96	1	1	1	1
1	16	5	2	3	4	3	3	5	4	4	4	37	3	3	4	2	4	4	5	2	3	2	4	5	3	2	5	3	4	3	5	3	5	4	3	2	4	2	3	21	18	21	18	9	87	2	1	2	2
2	16	3	3	2	3	1	2	2	2	2	4	24	2	2	3	5	4	3	5	4	4	1	4	3	5	2	3	3	4	4	3	5	3	5	3	5	3	5	4	21	27	14	16	16	94	3	3	3	3
1	18	4	2	2	3	2	4	2	2	4	2	27	4	4	4	4	4	4	4	4	4	4	4	4	4	4	4	3	4	4	4	4	4	4	4	4	4	4	4	24	24	20	19	16	103	2	2	2	2
1	16	1	5	5	1	5	1	5	5	1	5	34	5	5	1	5	1	5	3	3	4	3	3	3	3	3	4	3	4	4	3	3	3	3	3	5	2	2	1	17	19	18	13	16	83	3	0	3	0
1	16	3	2	2	3	2	4	4	3	3	3	29	3	2	3	4	4	3	4	2	3	3	3	4	4	3	3	3	2	3	1	4	3	4	2	4	3	4	3	16	19	15	16	15	81	1	1	2	1
1	16	5	5	5	5	5	5	5	5	5	5	50	5	5	5	5	5	5	5	5	5	5	5	5	5	5	5	3	5	5	5	5	5	5	5	5	5	5	5	30	30	25	23	20	128	3	3	3	3
1	17	3	4	3	3	4	4	4	5	4	5	39	3	4	1	5	4	4	5	5	5	4	4	5	5	4	5	3	5	5	4	5	5	5	4	5	5	5	5	27	30	23	15	19	114	3	1	3	2
1	17	4	4	2	2	3	3	4	4	4	4	34	4	4	4	4	4	4	5	5	5	5	5	5	4	4	5	4	5	5	5	5	5	5	4	5	5	5	5	28	29	23	21	19	120	2	2	2	3
1	16	4	4	4	3	3	4	4	4	3	5	38	3	3	3	5	4	4	5	5	5	3	3	5	5	2	5	3	5	3	5	4	5	5	4	5	5	5	5	24	30	22	16	17	109	3	2	1	0
2	16	4	4	4	3	4	3	4	3	4	4	37	4	4	4	5	4	4	5	5	5	5	4	3	5	4	5	4	5	5	5	5	5	5	4	5	5	5	5	28	30	21	20	20	119	2	3	3	3
1	15	4	3	5	4	5	4	5	5	4	5	44	2	2	1	5	2	3	5	5	5	3	3	4	5	2	4	2	5	4	2	5	4	5	2	5	5	5	5	20	30	18	10	18	96	2	1	2	2
1	16	3	4	2	3	3	3	4	3	4	4	33	2	2	2	4	4	4	4	5	5	3	4	2	5	4	3	3	5	5	3	5	3	5	3	5	3	5	4	23	30	14	15	17	99	1	2	2	1
1	17	5	4	2	4	2	3	4	1	5	4	34	4	2	2	5	4	5	5	5	5	2	5	5	5	3	5	4	5	5	5	5	4	5	4	5	5	5	5	27	30	21	19	17	114	3	1	1	1
2	17	3	4	4	3	4	3	4	4	2	4	35	4	3	4	5	4	5	5	5	5	5	5	5	5	4	5	4	5	5	5	5	5	5	4	5	5	5	5	28	30	23	21	20	122	2	2	2	2
1	16	5	4	4	3	2	4	4	3	4	4	37	2	3	2	3	3	4	2	3	3	4	2	2	4	4	2	3	5	4	1	2	4	5	4	5	2	4	2	17	24	15	12	14	82	0	3	3	0
1	16	5	4	4	4	4	4	5	4	4	4	42	4	4	4	5	4	5	5	5	5	5	5	5	5	5	5	4	5	5	5	5	5	5	5	5	5	5	5	30	30	24	21	20	125	2	0	2	2
1	16	4	2	2	3	3	3	1	2	3	3	26	3	4	4	5	5	5	4	4	4	2	4	4	4	2	2	2	5	3	3	4	5	5	3	5	5	4	3	18	26	23	18	16	101	1	1	1	1
1	18	5	5	5	5	5	5	5	5	5	5	50	5	4	5	5	5	5	5	5	5	5	5	5	5	5	5	5	5	5	5	5	5	5	5	5	5	5	5	30	30	24	25	20	129	3	3	3	3
2	15	4	2	2	3	2	3	4	3	3	2	28	4	4	3	5	4	5	5	5	5	4	5	4	5	3	5	4	5	5	5	5	4	5	4	5	2	5	5	27	30	19	20	19	115	2	2	2	2
2	17	4	3	3	4	4	3	3	3	4	4	35	4	4	4	5	4	4	4	4	4	3	4	4	4	3	4	3	5	4	4	4	5	4	3	4	4	4	4	22	25	21	19	16	103	3	2	2	3
1	17	2	2	2	3	2	2	2	2	3	2	22	2	2	2	5	4	4	4	3	4	1	4	4	5	3	4	3	4	3	1	5	2	4	2	5	4	3	4	17	23	16	15	16	87	2	3	3	3
1	16	4	3	4	2	4	3	3	2	4	4	33	2	2	2	4	4	3	4	3	4	2	4	3	4	4	4	3	5	5	5	5	4	5	4	5	5	5	5	27	26	17	15	16	101	2	2	2	2
2	16	4	4	4	4	2	4	4	4	4	4	38	3	4	3	4	4	4	4	4	4	3	3	4	4	3	3	4	4	4	4	4	4	4	4	4	4	4	4	23	24	20	17	15	99	2	3	3	3
2	17	4	5	5	3	2	4	5	3	3	5	39	2	2	2	5	5	5	5	5	5	5	5	5	5	5	5	3	5	5	5	5	3	5	4	5	2	5	5	29	30	17	17	20	113	3	2	3	3
2	16	4	4	4	4	4	5	4	4	4	4	41	4	4	3	5	4	4	5	5	5	4	3	4	5	4	3	3	4	4	2	4	4	5	3	4	4	4	4	22	28	20	17	17	104	2	2	2	2
2	16	3	4	2	3	2	4	3	2	4	4	31	2	4	4	5	4	4	4	4	5	2	4	4	5	4	5	3	5	5	2	4	3	5	4	5	4	5	5	24	29	19	17	16	105	3	3	3	3
2	16	4	4	4	2	2	2	4	2	2	2	28	2	2	2	4	4	4	4	4	4	4	4	2	4	4	4	2	4	4	4	4	2	4	2	4	3	4	4	22	24	13	14	16	89	1	1	1	1
2	17	3	4	4	3	3	4	4	3	4	4	36	4	4	3	5	4	5	5	5	5	5	4	4	5	3	5	4	5	4	5	5	4	5	3	5	4	5	5	25	30	21	19	20	115	2	1	2	3
2	16	2	2	2	2	3	2	2	4	3	2	24	4	3	2	5	4	3	3	4	4	4	3	4	5	4	2	2	5	2	1	5	2	5	4	5	5	5	1	15	28	17	15	19	94	2	2	1	0
1	17	4	4	4	4	4	4	4	4	4	4	40	4	4	4	5	4	5	5	5	5	5	5	5	5	4	5	4	5	5	5	5	5	5	4	5	5	5	5	28	30	24	21	20	123	2	2	2	2
1	17	4	2	2	4	2	4	2	2	4	3	29	2	2	4	2	4	2	2	5	2	2	2	3	4	2	4	2	4	4	4	4	4	4	2	4	4	4	4	18	23	15	14	12	82	2	2	2	2
2	17	5	5	5	4	1	5	5	1	4	5	40	2	1	1	5	4	3	1	5	5	1	1	1	5	1	1	1	5	3	1	5	2	5	4	5	5	5	1	11	30	12	9	16	78	3	1	3	3
1	17	3	1	1	2	3	1	1	3	2	1	18	1	3	2	2	3	3	1	1	2	1	5	3	3	2	1	2	3	1	1	1	4	3	2	1	4	3	2	9	15	17	13	5	59	1	1	0	1
1	17	4	5	5	4	2	3	5	2	1	5	36	5	5	4	5	4	5	5	5	5	5	5	5	5	4	5	4	5	5	5	5	5	5	4	5	5	5	5	28	30	25	22	20	125	2	1	2	2
2	17	4	4	4	4	4	4	4	4	4	4	40	4	2	2	5	4	3	5	5	5	5	5	4	5	4	5	3	5	5	5	5	3	5	4	5	3	5	5	28	30	15	18	20	111	2	3	3	3
2	17	4	4	4	4	4	2	4	4	4	4	38	4	4	4	4	4	4	4	4	4	4	4	4	4	4	4	3	4	4	4	4	4	4	4	4	4	4	4	24	24	20	19	16	103	2	3	2	2
2	16	3	4	4	2	2	3	4	2	2	4	30	2	1	2	5	5	4	5	5	5	5	5	1	5	4	5	4	5	5	5	5	4	5	4	5	1	5	5	28	30	11	18	20	107	3	3	3	3
2	16	3	2	3	3	3	3	3	3	4	4	31	3	4	3	4	4	4	5	4	4	4	4	4	4	3	3	3	4	4	4	4	4	4	3	4	4	4	4	23	24	20	17	16	100	2	2	3	3
1	16	4	4	4	4	4	4	4	4	4	5	41	4	5	4	5	4	4	5	5	5	4	5	5	5	4	5	4	5	5	5	5	5	5	4	5	5	5	5	28	30	24	21	19	122	3	2	1	2
2	16	5	4	4	2	5	2	5	5	4	4	40	4	5	2	5	4	5	5	5	5	2	5	5	5	4	4	4	5	5	5	5	5	5	4	5	5	5	5	28	30	25	19	17	119	2	2	2	2
2	16	2	5	4	2	3	3	3	3	3	5	33	4	4	2	4	4	4	4	5	5	4	4	4	5	4	5	2	5	5	5	5	5	5	4	2	5	5	5	27	30	22	16	15	110	1	2	2	2
2	16	4	3	4	3	2	3	3	2	3	3	30	3	3	3	3	3	3	3	3	3	3	3	3	3	3	3	3	3	3	3	3	3	3	3	3	3	3	3	18	18	15	15	12	78	3	3	3	3
2	15	4	3	2	3	3	3	4	3	4	5	34	3	5	1	3	3	3	4	3	3	3	3	3	3	3	3	3	3	3	3	3	3	3	3	3	3	3	3	19	18	17	13	12	79	3	3	3	3
2	17	4	2	2	4	3	4	2	2	4	5	32	4	4	2	5	2	4	5	5	5	4	4	5	4	4	4	2	4	4	4	4	4	4	1	4	4	4	4	22	26	21	14	17	100	1	1	1	2
1	15	5	5	5	4	4	4	5	5	5	5	47	4	5	3	5	4	4	5	4	5	5	4	4	5	4	4	3	5	4	5	5	5	5	2	5	5	4	5	25	28	23	18	20	114	3	3	3	3
2	16	4	2	2	1	1	4	4	2	4	2	26	2	3	3	4	3	2	2	4	2	2	4	4	4	5	3	2	4	3	5	4	2	4	4	5	4	4	5	24	22	15	14	15	90	0	0	1	1
1	16	4	2	2	3	2	3	3	2	3	3	27	2	2	3	4	3	3	4	4	4	1	2	3	3	2	2	3	4	3	2	4	4	4	3	4	3	3	3	17	22	15	13	13	80	1	3	3	2
2	15	3	3	3	3	3	3	3	3	3	3	30	3	3	1	3	3	3	3	3	3	1	2	3	3	1	1	1	3	3	1	3	3	1	1	3	3	3	2	11	16	15	10	10	62	0	0	0	0
2	17	5	1	2	4	2	2	4	2	4	1	27	2	2	2	5	5	3	5	2	2	3	2	5	5	1	4	4	2	2	3	5	3	2	5	5	5	5	5	21	18	18	15	18	90	2	3	1	0
1	17	3	4	2	2	2	4	4	2	4	4	31	4	2	4	3	3	4	4	5	5	2	2	2	5	4	5	4	5	5	3	3	4	5	2	4	4	5	5	23	30	16	17	12	98	1	1	1	1
2	15	5	4	3	1	3	3	3	3	3	3	31	3	3	1	4	3	3	4	3	5	1	5	3	5	4	4	3	5	5	1	5	4	5	4	5	5	5	4	22	28	18	15	15	98	2	1	2	1
2	16	4	3	3	4	2	5	5	4	4	5	39	4	2	2	5	5	5	5	5	5	4	5	5	5	5	5	4	5	5	5	5	2	5	5	5	5	5	5	30	30	19	20	19	118	2	3	3	3
2	17	3	3	3	3	3	3	3	3	3	3	30	3	3	3	3	3	3	3	3	3	3	3	3	3	3	3	3	3	3	3	3	3	3	3	3	3	3	3	18	18	15	15	12	78	2	2	2	2
1	16	5	5	3	3	5	3	5	5	5	3	42	1	5	1	5	1	5	5	5	5	5	5	5	5	1	5	1	5	5	5	5	5	5	1	5	5	5	5	22	30	25	9	20	106	2	2	2	2
2	16	2	2	3	3	2	3	4	2	3	2	26	2	1	1	5	4	3	4	3	4	1	2	3	4	2	4	2	4	4	3	5	2	5	2	5	2	4	2	17	24	11	11	16	79	3	1	1	1
1	16	3	3	3	3	3	3	3	3	3	3	30	3	4	3	3	4	5	5	5	5	2	3	4	5	3	5	3	5	5	4	5	4	5	4	5	4	5	3	24	30	21	16	15	106	1	1	2	1
1	16	3	2	3	3	3	3	3	3	3	2	28	2	2	3	1	3	3	3	3	3	3	3	3	3	2	3	3	3	2	2	3	2	3	3	2	3	3	2	14	18	13	14	9	68	0	0	0	0
2	16	4	4	3	2	4	3	4	3	3	4	34	4	3	3	4	4	3	3	5	5	5	3	4	4	3	3	3	5	4	3	4	3	4	3	4	5	5	4	20	28	18	17	17	100	2	1	2	0
1	16	4	5	5	4	5	4	5	5	4	5	46	5	5	5	5	5	5	5	5	5	5	5	5	5	5	5	5	5	5	5	5	5	5	5	5	5	5	5	30	30	25	25	20	130	3	3	3	3
2	17	5	4	2	3	3	5	3	2	4	3	34	4	2	2	4	4	5	4	5	5	3	4	5	5	2	5	2	5	5	5	5	4	5	5	5	5	5	5	26	30	21	16	17	110	3	3	3	3
2	17	5	4	4	4	3	4	4	3	4	5	40	2	4	4	5	4	4	5	5	3	2	4	5	5	3	4	2	5	4	5	5	5	5	1	5	5	5	4	22	28	23	16	17	106	2	3	1	2
1	17	2	3	2	2	3	3	3	3	3	3	27	4	3	4	4	4	3	3	3	3	2	3	3	3	3	3	3	3	3	3	3	4	4	1	3	4	2	3	16	18	17	18	12	81	1	1	1	1
1	17	3	2	4	3	4	3	4	3	4	5	35	5	2	3	5	5	4	5	2	1	4	4	5	5	1	2	1	2	4	5	5	3	1	1	5	3	5	1	17	16	17	18	19	87	3	0	2	3
1	17	3	2	3	3	4	3	3	3	3	3	30	3	3	2	5	3	3	5	5	2	5	4	1	3	1	5	1	3	3	3	5	4	3	3	5	2	3	3	18	19	13	13	20	83	1	1	2	1
2	17	4	4	4	4	4	4	4	4	4	4	40	5	4	4	5	4	5	5	5	5	4	5	5	5	4	5	4	5	5	5	5	4	5	4	5	4	5	5	28	30	22	22	19	121	2	2	3	2
1	16	5	5	5	5	5	5	5	5	5	5	50	5	5	5	5	5	5	5	5	5	5	5	5	5	5	5	5	5	5	5	5	5	5	5	5	5	5	5	30	30	25	25	20	130	0	3	3	3
2	16	4	4	4	4	4	4	4	4	4	4	40	4	4	4	5	4	4	4	4	4	4	4	4	4	4	4	4	4	4	4	4	4	4	4	4	4	4	4	24	24	20	20	17	105	2	3	3	3
1	16	4	3	4	3	3	2	3	2	4	3	31	2	1	3	3	4	2	5	5	5	3	2	4	5	4	5	1	5	4	1	4	2	5	1	5	4	5	1	16	30	13	12	15	86	1	3	2	0
1	16	5	4	2	3	2	5	5	4	4	5	39	2	5	2	5	2	5	5	5	5	5	5	5	5	5	5	5	5	5	5	5	5	5	5	5	5	5	5	30	30	25	16	20	121	2	3	3	3
1	17	4	4	3	4	3	4	3	3	4	4	36	4	4	3	5	4	4	4	4	4	3	4	5	4	4	5	4	5	4	4	5	5	4	4	5	5	5	5	25	26	23	19	18	111	2	2	2	2
1	15	3	5	3	2	2	4	4	4	4	4	35	4	4	4	5	5	3	5	5	5	1	3	4	5	3	1	1	4	3	3	5	5	5	4	5	5	5	5	23	29	21	17	16	106	1	2	0	0
2	16	5	2	2	3	3	2	3	2	5	1	28	4	4	2	5	5	3	5	4	3	1	5	4	4	2	3	3	3	2	3	4	4	3	2	5	3	4	3	17	21	18	19	15	90	0	0	1	1
2	17	3	2	3	2	2	2	2	2	3	2	23	3	4	3	4	4	2	4	4	4	2	2	3	4	2	2	3	4	2	2	4	4	4	3	4	3	4	3	16	24	16	15	14	85	2	2	2	2
2	16	4	4	4	4	4	5	5	5	4	5	44	2	2	3	5	5	4	4	5	5	3	3	4	5	4	5	3	5	5	5	5	4	5	4	5	4	5	5	27	30	18	16	18	109	1	1	2	1
2	17	5	5	1	5	5	5	5	5	5	5	46	5	2	5	5	5	5	5	5	5	5	5	4	5	5	5	5	5	5	5	5	2	5	5	5	5	5	5	30	30	18	25	20	123	3	3	3	3
2	16	3	4	2	3	4	4	4	4	4	3	35	3	3	2	4	4	3	4	5	5	3	4	2	3	4	3	4	5	5	2	5	3	5	3	5	4	5	5	23	28	15	17	17	100	1	2	1	2
2	17	4	3	4	3	3	2	4	3	4	4	34	4	4	4	5	4	4	5	5	5	2	3	2	5	4	4	3	5	5	2	5	5	5	4	5	5	5	5	25	30	20	18	17	110	3	1	2	3
2	17	4	2	3	2	3	2	2	2	4	2	26	3	4	4	5	4	4	5	5	5	4	4	4	5	4	4	4	5	5	5	5	4	5	4	5	5	5	5	28	30	21	19	19	117	1	1	1	2
1	16	5	4	4	5	2	4	4	4	4	2	38	5	5	4	5	5	4	5	4	2	4	5	5	4	5	5	5	4	5	5	5	5	4	5	5	5	4	5	30	22	24	24	19	119	2	1	2	2
2	17	5	4	4	5	4	5	4	4	5	4	44	5	5	5	5	5	5	5	5	5	5	5	5	5	5	5	5	5	5	3	5	5	5	5	5	5	5	5	28	30	25	25	20	128	2	3	3	3
2	16	4	4	2	3	2	4	2	2	3	5	31	3	4	2	5	4	3	4	4	5	3	4	3	4	3	3	4	5	5	4	5	5	5	4	5	4	5	5	25	28	19	17	18	107	2	2	2	2
1	16	2	4	3	2	2	4	5	4	2	4	32	3	3	2	5	2	4	5	3	4	1	4	3	4	3	2	2	4	3	3	4	4	3	2	5	5	3	2	18	21	19	13	15	86	1	1	0	0
2	17	3	3	3	3	2	3	3	3	4	3	30	2	2	3	5	3	3	5	5	3	5	3	5	5	3	4	3	4	5	5	5	4	4	3	5	3	5	5	26	26	17	14	20	103	2	1	1	1
1	17	5	1	1	5	1	5	1	1	5	1	26	2	3	3	3	3	3	4	5	2	1	3	3	1	1	3	3	3	3	3	3	3	2	2	3	3	3	1	14	16	15	14	10	69	3	0	1	1
1	17	4	2	2	2	4	3	3	4	2	3	29	2	2	2	3	2	3	5	5	4	1	2	4	4	3	3	2	4	3	1	1	4	4	2	3	4	4	4	18	25	17	10	8	78	0	3	3	3
1	17	3	5	5	3	1	1	5	5	3	5	36	2	2	2	3	2	3	5	5	4	1	2	4	4	3	3	2	4	3	1	1	4	4	2	3	4	4	4	18	25	17	10	8	78	0	3	3	3
1	16	3	3	3	3	3	3	3	3	3	3	30	3	3	3	3	3	3	3	3	3	3	3	3	3	3	3	3	3	3	3	3	3	3	3	3	3	3	3	18	18	15	15	12	78	1	1	1	1
1	16	4	3	2	3	2	3	3	3	4	4	31	3	4	2	5	4	3	4	5	5	2	3	3	4	4	3	4	5	5	4	5	4	5	2	5	4	5	5	24	29	18	16	17	104	2	1	2	1
1	16	4	3	2	3	3	3	4	5	4	3	34	4	2	2	4	3	4	5	5	5	5	5	4	5	2	4	2	5	4	3	4	3	4	3	5	5	5	3	20	29	18	16	18	101	0	2	1	2
1	16	4	2	2	4	3	3	4	4	4	3	33	2	1	4	5	4	2	5	5	5	2	5	4	5	2	4	3	5	5	5	5	4	5	4	5	4	5	5	26	30	15	18	17	106	3	3	3	3
2	16	5	4	5	4	4	4	5	4	2	5	42	4	5	4	5	4	5	5	5	5	5	5	5	5	4	5	4	5	5	5	5	5	5	4	5	5	5	5	28	30	25	21	20	124	3	3	3	3
2	16	4	2	3	3	2	4	3	4	5	5	35	4	3	4	5	5	3	5	5	5	5	4	4	5	4	4	3	5	2	3	5	5	5	4	5	3	5	3	21	30	18	20	20	109	2	3	3	2
2	16	3	2	4	2	3	3	3	3	4	4	31	4	4	4	5	5	4	5	3	3	3	4	3	3	3	5	3	5	5	5	5	5	5	4	5	5	5	4	26	24	21	20	18	109	2	3	2	2
1	16	4	2	2	2	2	1	1	2	5	1	22	4	2	4	5	4	4	4	3	2	3	4	2	5	1	2	2	4	2	5	5	5	5	2	5	5	5	5	19	24	18	18	18	97	3	1	0	1
1	16	2	4	3	2	2	2	4	2	3	3	27	1	2	1	1	1	4	4	3	4	2	1	3	3	2	2	1	5	3	4	2	2	4	2	1	2	4	2	17	23	13	5	6	64	0	1	1	1
1	17	4	4	4	4	1	4	3	1	4	3	32	2	2	4	2	4	3	5	5	5	2	4	4	5	5	5	5	5	5	5	4	4	5	5	4	5	5	5	30	30	18	19	12	109	2	2	2	2
2	15	5	4	5	4	5	4	5	5	4	5	46	5	5	5	5	5	5	5	5	5	5	5	5	5	5	5	5	5	5	5	5	5	5	5	5	5	5	5	30	30	25	25	20	130	2	1	3	3
2	16	4	4	3	4	3	4	3	3	3	4	35	4	4	4	5	4	4	5	5	5	4	4	4	5	4	4	4	5	4	2	5	4	5	4	5	4	5	5	24	30	20	20	19	113	1	2	3	3
1	16	5	5	5	4	4	4	4	4	4	5	44	5	5	4	5	5	5	5	5	5	5	5	5	5	5	5	4	5	5	5	5	5	5	5	5	5	5	5	30	30	25	23	20	128	1	3	3	3
2	17	4	3	4	3	2	4	3	4	5	4	36	3	4	3	5	4	4	5	5	5	4	2	3	5	3	4	4	3	4	3	5	5	2	4	5	5	5	5	24	25	21	16	19	105	2	1	3	2
2	15	2	3	2	2	2	3	2	2	3	3	24	2	2	2	5	4	3	2	4	4	2	2	4	4	3	2	3	4	3	2	4	4	4	3	4	3	4	3	16	24	16	13	15	84	2	2	1	2
2	16	4	4	3	3	4	4	3	3	4	4	36	4	4	4	5	4	5	5	4	4	3	5	5	5	4	5	4	5	5	5	5	5	5	4	5	5	5	5	28	28	24	21	18	119	3	1	3	3
1	16	2	2	2	2	3	2	2	2	2	5	24	4	5	4	5	4	4	5	5	5	4	5	5	5	4	5	3	5	5	5	5	5	5	4	5	5	5	5	28	30	24	20	19	121	3	3	3	3
1	16	4	3	2	3	3	4	3	4	4	4	34	4	2	4	5	4	3	4	4	4	2	4	4	4	3	3	2	4	4	2	5	4	4	3	5	4	4	4	20	24	17	18	17	96	3	1	3	2
2	17	5	5	5	5	5	5	5	5	5	5	50	5	5	5	5	5	5	5	5	5	5	5	5	5	5	5	5	5	5	5	5	5	5	5	5	5	5	5	30	30	25	25	20	130	3	3	3	3
2	17	3	2	3	3	2	2	3	2	4	4	28	2	3	2	4	2	4	4	4	4	2	3	4	4	4	4	4	5	5	5	4	4	5	4	4	4	5	5	27	27	19	13	14	100	2	3	2	2
2	16	2	2	3	3	2	2	2	2	3	2	23	2	2	2	5	2	2	4	4	4	2	3	3	4	3	4	3	5	5	2	5	4	5	3	5	4	5	3	20	27	15	12	17	91	1	2	2	3
2	17	3	2	1	3	4	2	1	4	2	1	23	4	4	5	5	5	1	5	1	1	4	5	3	1	2	5	1	1	1	3	5	5	1	3	5	3	1	4	18	6	16	20	19	79	3	3	2	3
1	16	4	4	4	3	3	4	4	3	4	4	37	3	4	3	4	2	3	5	5	5	4	4	5	5	2	4	2	5	5	3	4	4	5	4	4	4	5	4	23	30	20	14	16	103	1	3	2	1
1	16	4	4	4	2	2	3	2	2	3	4	30	2	2	2	5	3	4	5	5	5	5	2	5	5	4	4	2	5	5	5	5	5	5	4	5	4	5	5	28	30	20	11	20	109	1	3	1	1
1	16	4	4	4	4	4	4	4	4	4	4	40	4	4	2	4	2	4	4	4	5	2	3	5	5	5	5	4	5	5	5	5	5	5	5	2	4	5	5	29	29	22	15	13	108	2	3	1	3
1	16	3	3	3	3	3	3	3	3	3	3	30	5	5	1	5	1	5	5	5	5	5	5	5	5	1	5	1	5	5	5	5	5	5	1	5	5	5	5	22	30	25	13	20	110	1	1	1	1
2	16	4	3	4	3	4	4	4	4	3	4	37	3	4	2	5	4	5	5	4	5	5	5	4	4	4	4	3	5	5	4	5	4	5	4	5	4	5	5	27	28	21	17	20	113	3	3	3	2
1	16	3	2	3	3	3	3	3	3	3	3	29	3	2	2	4	3	3	4	4	2	3	3	4	4	3	4	3	4	3	3	4	3	4	3	4	4	4	4	20	22	16	14	15	87	2	2	2	2
1	17	4	1	2	3	2	4	2	2	4	4	28	4	4	2	5	5	4	4	4	4	2	4	4	4	4	4	4	4	4	4	4	4	4	4	5	2	4	5	25	24	18	19	16	102	2	2	2	2
2	16	3	4	3	3	3	4	3	3	3	4	33	2	3	2	4	3	4	4	4	5	1	3	4	4	3	3	3	5	2	3	3	3	5	2	5	3	5	4	18	28	17	13	13	89	3	3	3	1
1	16	5	2	2	3	5	4	3	5	4	3	36	2	2	2	3	4	1	3	5	3	1	5	3	3	3	3	4	5	3	1	5	5	5	2	5	3	4	3	15	25	14	17	14	85	1	1	1	1
1	17	3	3	3	4	3	3	3	3	5	2	32	5	4	3	5	4	4	5	4	5	4	5	5	5	4	4	3	5	4	5	5	5	5	4	5	5	5	5	27	29	23	20	19	118	3	2	1	2
2	16	4	3	4	4	4	4	2	3	4	4	36	4	2	2	5	4	5	4	5	5	4	4	4	2	4	4	4	5	5	4	5	4	5	2	5	2	5	5	24	27	17	18	19	105	2	3	3	2
2	16	3	2	2	3	3	3	3	3	3	3	28	3	3	3	5	4	2	5	3	2	3	3	3	3	3	3	3	5	3	3	5	3	5	3	5	3	5	5	22	23	14	16	18	93	2	3	3	3
2	16	3	4	3	2	3	3	4	3	4	4	33	4	3	2	4	4	4	4	5	5	4	4	4	5	4	4	4	5	5	4	5	5	5	4	5	4	5	4	25	30	20	18	18	111	1	3	2	2
2	16	4	4	4	3	4	4	4	3	4	5	39	4	2	4	5	4	3	4	4	4	2	4	3	4	4	4	2	4	4	5	5	4	4	4	5	4	5	4	25	25	16	18	17	101	3	3	2	2
2	15	4	2	2	3	3	4	2	2	4	4	30	5	5	4	5	4	5	5	5	5	5	5	5	5	4	5	4	5	4	5	5	5	5	4	5	5	5	5	27	30	25	22	20	124	2	2	2	2
1	16	2	1	2	3	2	2	2	2	4	3	23	3	2	2	5	2	5	5	3	2	2	1	2	3	1	4	2	3	3	3	5	5	5	1	3	4	4	4	17	20	18	10	15	80	2	0	3	3
1	16	3	3	4	3	3	4	4	4	4	3	35	4	3	4	3	3	4	4	4	2	4	2	3	4	2	2	2	4	4	4	4	4	2	2	4	4	4	4	20	20	18	15	15	88	2	2	2	2
1	16	4	4	4	2	2	4	4	4	2	2	32	2	2	2	5	2	2	5	5	5	1	1	2	5	4	1	1	5	5	1	5	2	5	1	5	4	5	1	17	30	12	8	16	83	3	1	1	2
2	16	4	4	4	3	4	3	4	3	3	4	36	4	4	3	5	4	4	5	4	4	4	4	3	4	3	5	2	4	5	5	5	5	4	3	4	4	4	5	26	24	20	17	18	105	1	1	1	1
1	17	4	3	4	3	4	4	3	4	3	3	35	3	4	3	4	4	3	5	3	3	3	4	3	5	3	4	3	2	3	3	5	3	3	3	5	5	3	5	22	19	18	17	17	93	1	1	2	2
1	16	4	2	2	4	2	4	2	2	4	2	28	2	2	4	2	4	2	2	2	2	2	2	2	2	4	2	4	2	2	2	2	2	2	4	2	2	2	2	16	12	10	16	8	62	2	2	2	2
2	17	4	2	1	4	2	2	3	3	4	1	26	2	2	2	4	4	4	5	5	5	2	2	4	4	4	3	4	5	3	4	4	4	5	3	5	4	5	3	22	29	18	14	15	98	2	2	3	1
2	16	4	5	5	4	3	3	4	4	4	5	41	3	4	3	5	4	5	5	5	5	5	5	5	5	3	5	2	5	5	5	5	5	5	3	5	5	5	5	26	30	24	17	20	117	2	3	2	3
1	16	5	5	5	5	5	5	5	5	5	5	50	5	5	5	5	5	1	5	5	5	1	5	5	4	4	5	1	1	1	5	5	5	5	3	5	5	3	4	22	23	21	21	16	103	3	3	3	3
2	17	5	4	5	3	4	5	4	4	5	5	44	4	4	4	5	4	5	5	5	5	5	4	5	5	3	5	3	5	5	5	5	5	5	4	5	5	5	5	27	30	24	19	20	120	3	2	2	3
1	16	3	3	3	3	3	3	3	3	2	2	28	3	3	3	3	3	3	3	3	4	4	4	4	4	2	4	2	4	4	4	4	4	4	2	2	3	4	4	19	23	17	15	13	87	1	1	1	1
2	16	3	1	1	2	2	1	2	2	3	2	19	3	3	3	5	4	5	5	5	5	3	5	5	5	5	5	3	5	3	5	5	2	5	4	5	4	5	5	27	30	19	18	18	112	3	3	3	3
2	16	4	1	2	1	2	2	4	4	3	2	25	2	1	1	5	2	2	2	3	4	2	2	4	5	3	3	3	4	3	4	5	5	4	3	5	3	4	4	19	24	15	10	17	85	1	2	1	0
1	16	4	4	3	4	2	3	2	2	4	3	31	4	4	2	4	4	4	4	4	4	4	4	4	4	4	4	4	4	4	4	4	4	4	4	4	4	4	4	24	24	20	18	16	102	1	1	1	1
1	16	4	3	3	4	4	3	3	4	5	3	36	4	2	4	5	5	2	4	4	4	4	2	4	3	2	3	3	4	4	3	5	2	5	3	5	5	5	5	21	25	15	18	19	98	3	3	3	3
2	17	3	4	4	3	2	3	3	2	4	4	32	3	4	4	5	4	4	5	5	5	4	4	4	5	3	4	3	5	3	4	5	4	5	4	5	4	4	4	23	29	20	18	19	109	1	2	2	2
2	16	4	5	4	3	2	4	3	2	5	5	37	2	4	2	5	4	5	5	5	5	5	5	5	5	5	5	4	5	5	4	5	4	5	5	5	5	5	5	29	30	23	17	20	119	2	3	3	2
1	17	4	3	4	4	2	4	4	2	4	5	36	4	2	4	4	4	3	4	4	4	2	4	4	4	4	4	4	4	4	4	4	4	5	4	5	5	5	5	25	26	18	20	15	104	2	2	2	3
1	16	2	2	3	3	1	3	2	2	3	3	24	2	2	3	4	4	5	2	3	3	2	2	3	4	2	3	2	5	2	3	4	2	4	3	5	4	3	3	15	22	16	13	15	81	1	1	1	1
1	17	5	5	5	5	5	5	5	5	5	5	50	5	5	4	5	5	5	5	5	5	5	5	5	5	5	5	5	5	5	5	5	5	5	5	5	5	5	5	30	30	25	24	20	129	3	3	3	2
1	16	5	5	5	2	3	4	5	3	4	5	41	2	4	1	5	2	3	5	5	5	2	3	5	4	3	4	3	5	4	2	5	5	5	3	5	5	5	5	22	29	22	11	17	101	3	3	3	3
2	16	3	3	3	2	2	3	2	2	4	3	27	3	4	4	4	3	3	3	4	3	3	3	4	4	3	3	2	5	3	2	4	4	4	3	5	5	5	3	17	25	20	15	16	93	1	1	2	2
2	16	4	4	4	3	4	4	4	4	4	4	39	4	4	4	5	4	4	4	4	4	4	4	4	4	4	4	3	5	4	4	5	3	5	4	5	3	5	5	25	27	18	19	19	108	2	2	3	3
1	16	5	5	4	3	3	5	5	1	4	5	40	4	5	2	4	4	5	5	5	5	5	5	5	5	5	5	4	5	5	5	5	4	5	5	4	5	5	5	30	30	24	19	18	121	2	2	1	3
2	16	4	4	4	3	4	4	4	4	4	4	39	4	4	4	5	5	4	4	5	5	4	4	5	5	4	5	5	5	5	5	5	5	5	5	5	5	5	5	28	30	23	22	19	122	3	3	3	3
1	16	4	4	2	4	4	4	4	2	4	4	36	4	2	4	5	4	4	5	2	4	4	4	4	4	2	4	3	2	4	2	5	2	4	4	5	5	4	4	21	20	17	19	19	96	3	3	3	3
1	16	3	4	4	3	4	3	3	3	4	4	35	4	3	4	4	4	4	4	4	4	5	5	5	5	1	5	1	5	5	5	5	5	5	1	5	5	5	5	21	28	22	18	19	108	1	1	1	1
1	16	5	5	4	4	5	5	4	5	5	5	47	4	4	4	5	5	5	5	5	5	4	5	5	5	4	5	4	5	5	5	5	5	5	4	5	5	5	5	28	30	24	22	19	123	2	3	3	3
1	16	2	3	2	4	2	3	3	2	4	4	29	5	4	3	5	5	5	5	5	5	3	5	5	5	3	5	4	5	5	5	5	5	5	4	5	5	5	5	27	30	24	22	18	121	3	1	2	2
1	16	4	3	4	3	4	4	4	3	4	4	37	4	3	4	5	4	4	4	4	4	3	4	4	4	3	3	4	4	4	4	5	5	5	3	5	5	5	5	23	26	21	20	18	108	2	2	2	2
2	16	3	2	2	3	3	1	3	2	5	3	27	3	4	4	5	5	3	5	5	5	4	4	5	5	4	5	4	5	5	5	5	5	5	4	5	5	5	5	28	30	22	20	19	119	1	3	2	3
2	16	3	3	3	2	4	2	3	3	4	3	30	2	2	2	3	4	3	2	3	4	4	3	2	4	4	4	3	4	4	4	4	2	4	4	4	4	4	4	22	23	13	14	15	87	0	2	2	2
2	16	4	3	3	3	3	4	3	2	4	4	33	3	2	2	2	4	2	2	4	4	2	2	2	4	4	4	3	5	5	2	5	4	5	4	5	5	5	5	22	27	15	14	14	92	1	3	2	2
2	16	4	4	4	4	2	4	4	3	3	4	36	3	4	3	5	4	3	2	5	5	5	4	5	5	1	4	3	5	5	4	5	4	5	4	5	4	5	4	20	30	20	17	20	107	1	3	2	3
2	16	3	3	3	3	2	3	3	3	4	3	30	2	1	2	5	3	3	3	4	4	3	2	3	4	2	3	3	4	3	4	4	2	4	3	4	2	4	3	18	24	11	12	16	81	1	1	1	1
2	16	4	3	3	3	3	4	4	3	4	4	35	4	4	3	5	4	4	5	5	5	3	5	5	5	4	5	4	5	5	5	5	5	5	4	5	5	5	5	28	30	23	20	18	119	2	2	2	2
2	17	5	3	5	4	5	4	5	5	1	4	41	3	3	4	4	4	3	5	3	5	3	3	3	3	4	5	3	5	3	5	5	5	5	3	5	5	5	5	25	26	19	17	17	104	3	3	3	3
2	16	4	2	4	3	4	3	4	4	4	4	36	4	4	2	4	4	4	2	4	4	4	4	4	4	4	2	4	4	4	4	4	4	4	3	4	4	4	4	21	24	20	18	16	99	1	1	1	1
1	16	4	5	4	3	4	5	5	4	5	5	44	4	4	4	5	5	4	5	5	5	4	5	5	5	5	5	4	5	5	5	5	5	5	4	5	5	5	5	29	30	23	22	19	123	1	1	3	2
1	17	2	1	3	3	2	2	2	2	2	1	20	2	3	1	2	2	3	3	3	3	3	2	4	3	1	1	3	3	3	3	3	3	3	3	3	3	3	3	16	18	16	10	11	71	1	1	1	1
2	16	4	4	5	4	4	4	4	4	4	4	41	4	4	4	5	4	5	5	5	4	5	4	4	4	4	5	4	5	5	5	5	4	4	4	5	5	5	5	28	27	22	20	20	117	2	2	2	2
2	15	3	1	1	2	1	1	1	1	3	1	15	1	2	1	5	5	2	3	4	3	2	1	4	2	1	3	2	5	2	2	5	3	5	1	5	3	3	2	11	22	14	10	17	74	0	3	2	3
2	16	5	5	3	4	4	4	4	4	4	5	42	4	4	4	5	4	4	3	4	4	3	5	4	3	3	4	3	4	4	5	5	5	4	3	5	5	3	5	23	22	22	20	18	105	3	1	2	3
2	17	4	4	3	4	2	3	4	3	5	5	37	4	5	2	5	4	3	4	3	4	1	2	5	5	4	4	3	5	4	1	5	4	5	4	5	5	5	4	21	27	22	15	16	101	1	1	1	1
2	16	5	2	3	2	2	4	3	1	4	4	30	2	2	4	5	5	2	1	2	2	4	4	1	2	2	2	2	2	3	5	5	5	4	2	5	3	4	3	16	16	13	17	19	81	1	3	2	1
1	16	3	3	2	2	3	3	2	3	4	2	27	4	2	2	4	4	4	5	5	5	4	5	3	5	4	5	4	5	5	5	5	3	5	4	5	3	5	5	28	30	15	19	18	110	3	1	3	2
1	16	3	1	1	1	3	1	1	1	4	1	17	4	4	3	5	3	1	5	1	1	1	5	5	1	5	5	1	1	1	5	5	3	1	1	5	5	1	2	19	6	18	16	16	75	1	2	2	2
2	17	5	4	4	4	4	5	4	4	4	5	43	2	4	2	5	4	4	5	5	5	5	5	5	5	4	5	4	5	5	5	5	5	5	4	5	5	5	5	28	30	23	17	20	118	3	3	3	3
2	16	3	2	1	2	1	3	2	2	3	2	21	4	5	4	5	4	2	5	5	5	4	5	5	5	2	5	3	5	3	2	5	5	5	3	5	5	5	5	20	30	22	20	19	111	2	3	2	1
1	17	2	1	3	3	3	2	4	2	2	1	23	3	4	3	3	4	3	4	4	3	3	3	4	3	2	3	3	3	3	3	4	4	3	3	4	4	4	3	18	20	19	16	14	87	3	1	0	0
2	16	4	5	5	2	2	2	2	2	2	2	28	5	4	5	5	5	4	5	4	5	4	4	5	4	4	5	3	5	5	5	5	4	5	4	5	4	5	5	28	28	21	22	19	118	1	3	1	2
2	16	3	3	1	3	2	2	2	2	3	3	24	3	2	2	5	3	3	4	5	5	2	3	2	5	2	2	3	5	2	1	5	4	5	2	5	2	5	3	14	30	13	14	17	88	2	2	1	1
2	16	4	4	4	4	4	5	5	4	5	5	44	5	5	4	2	3	5	5	5	5	5	5	5	5	5	5	5	5	5	5	2	4	5	4	4	5	5	4	28	30	24	22	13	117	3	1	1	1
2	16	4	4	4	3	4	3	4	4	4	5	39	4	4	4	5	4	4	5	5	5	4	3	5	5	3	5	3	5	5	5	5	4	5	4	5	4	5	5	27	30	21	18	19	115	3	3	2	1
2	16	4	3	3	4	3	4	3	3	4	4	35	4	4	4	5	4	4	4	4	4	3	3	3	4	3	3	3	4	3	3	4	4	4	3	4	4	4	4	20	24	19	18	16	97	3	2	3	3
1	16	4	3	4	4	3	4	5	4	4	4	39	4	3	3	5	3	4	4	4	5	2	4	3	4	4	4	3	5	4	3	4	3	5	3	5	4	5	4	22	28	17	17	16	100	2	2	2	2
1	16	4	4	4	4	3	2	3	4	4	4	36	4	3	4	4	4	3	4	3	4	1	4	4	4	4	3	2	4	4	1	4	4	4	2	4	4	4	4	19	23	18	18	13	91	1	1	2	2
2	16	2	3	1	2	3	3	2	2	3	3	24	4	5	2	4	2	3	5	5	5	1	4	5	5	2	5	1	5	5	5	5	4	3	3	3	5	5	5	25	28	22	13	13	101	2	1	2	2
1	17	5	4	3	4	5	5	4	5	5	5	45	5	5	4	5	5	4	5	5	5	5	5	5	5	5	5	5	5	5	5	5	5	5	5	5	5	5	5	30	30	24	24	20	128	2	3	2	3
2	16	5	4	4	4	5	5	5	4	4	5	45	4	4	3	4	4	5	5	5	5	5	5	5	5	5	5	4	5	5	5	4	5	5	5	5	5	5	5	30	30	24	20	18	122	2	2	2	2
1	16	4	2	2	3	2	2	2	2	4	3	26	2	3	3	4	3	2	5	3	3	2	3	3	5	3	5	3	4	3	5	4	4	4	3	4	4	3	5	24	22	16	14	14	90	1	1	1	1
1	16	3	3	3	4	2	3	3	2	4	4	31	3	2	3	5	4	3	5	5	5	1	5	3	5	4	5	3	5	4	4	5	4	5	3	5	3	5	5	25	30	15	18	16	104	3	0	2	3
2	16	4	4	4	2	1	4	4	1	5	4	33	2	3	2	5	4	3	5	5	5	2	3	5	5	3	2	1	5	5	1	5	5	5	2	5	4	5	3	19	30	20	12	17	98	1	3	2	3
2	16	5	5	5	5	5	5	5	5	5	5	50	1	5	1	3	5	1	5	5	1	1	5	5	3	3	5	1	5	5	5	5	5	5	2	5	5	5	5	25	24	21	13	14	97	3	3	3	3
1	16	5	5	5	5	5	5	5	5	5	5	50	5	5	5	5	5	5	5	5	5	4	5	5	5	5	5	4	5	5	5	5	5	5	4	5	5	5	5	29	30	25	24	19	127	3	3	3	3
1	16	5	4	4	2	4	5	5	5	4	5	43	2	5	1	5	1	5	5	5	5	1	1	5	5	5	5	3	5	5	5	5	5	5	4	5	5	5	5	29	30	25	8	16	108	3	0	1	1
1	16	3	2	2	3	3	3	3	3	3	2	27	3	2	2	4	4	2	4	2	3	2	2	2	2	4	1	1	2	2	2	3	4	4	2	4	4	3	3	17	16	14	12	13	72	1	1	1	1
2	16	3	4	4	3	4	2	4	1	5	5	35	5	4	5	5	2	5	3	5	5	2	5	5	5	5	3	3	5	5	5	4	4	5	2	5	5	5	5	25	30	23	20	16	114	1	3	3	2
1	16	5	4	4	4	4	4	5	5	4	5	44	5	5	4	5	4	5	5	5	5	3	3	5	5	3	3	3	5	5	3	5	3	5	3	5	5	5	5	24	30	23	19	18	114	3	1	2	3
1	16	2	2	1	1	1	1	1	1	2	2	14	1	3	1	1	1	1	3	4	4	1	2	4	5	1	3	1	5	2	1	1	3	4	1	1	4	4	2	10	26	15	6	4	61	0	1	1	1
1	17	3	2	4	3	4	2	4	4	4	4	34	4	2	2	5	4	3	4	4	3	3	3	3	3	3	3	3	3	3	3	3	3	3	3	3	3	3	3	19	19	14	16	14	82	1	1	2	2
1	16	5	4	5	4	3	4	5	4	2	4	40	1	1	1	5	2	1	5	5	2	2	2	4	5	2	1	1	4	2	1	5	2	4	4	5	4	5	2	16	25	12	7	17	77	1	0	3	1
2	17	2	3	1	4	2	2	2	1	3	3	23	4	2	1	5	4	3	4	3	5	4	4	5	3	2	4	3	5	4	2	5	3	5	3	5	3	5	3	18	26	16	16	19	95	2	3	1	1
2	16	3	2	4	3	2	2	3	2	4	4	29	4	2	2	5	4	4	4	5	5	2	2	2	5	2	3	2	5	4	2	5	4	5	2	5	5	5	5	19	30	17	14	17	97	1	1	1	1
2	16	4	2	5	4	3	3	4	4	4	3	36	5	5	4	5	5	5	5	5	3	4	4	5	5	3	3	3	5	4	3	5	3	5	3	5	5	5	4	22	28	23	21	19	113	1	2	1	3
1	16	5	4	2	3	1	1	5	3	5	4	33	3	3	3	3	3	3	3	3	3	3	3	3	3	3	3	3	3	3	3	3	3	3	3	3	3	3	3	18	18	15	15	12	78	1	1	1	2
2	16	3	2	2	3	2	2	2	2	3	2	23	2	1	4	2	4	2	1	4	4	1	2	2	4	1	1	1	5	2	1	5	2	5	1	5	4	5	2	8	27	11	13	13	72	2	0	1	2
1	16	3	2	2	3	2	3	3	3	2	4	27	4	4	2	4	3	3	4	3	3	3	4	4	3	2	4	3	3	3	4	4	3	4	3	3	3	3	3	19	19	17	16	14	85	3	3	2	2
2	16	5	5	3	4	4	4	5	5	4	5	44	4	4	4	5	5	5	5	5	5	4	5	5	5	5	5	5	5	5	5	5	5	5	5	5	5	5	5	30	30	24	23	19	126	2	2	2	2
2	16	2	1	2	2	2	3	3	2	2	2	21	2	3	2	5	4	2	4	2	1	2	3	2	3	3	3	3	3	2	3	5	4	3	1	5	3	3	3	16	15	14	14	17	76	1	2	2	1
2	16	1	3	4	3	1	3	2	2	4	3	26	2	2	4	5	2	4	5	5	5	2	3	4	3	4	4	3	5	5	5	5	4	5	3	5	2	5	5	27	28	16	14	17	102	3	2	3	3
2	16	5	4	4	4	4	5	4	2	4	5	41	5	5	5	5	4	5	5	5	5	5	5	5	5	5	5	5	5	5	5	5	5	5	5	5	5	5	5	30	30	25	24	20	129	3	3	3	3
2	16	4	4	3	2	3	4	3	3	3	4	33	3	4	2	5	4	4	4	5	5	2	3	4	5	5	5	4	5	5	4	5	5	5	3	5	5	5	5	26	30	22	16	17	111	1	2	1	1
2	16	2	4	2	4	2	3	3	3	4	4	31	2	3	4	5	4	4	5	5	5	4	4	4	5	4	5	4	5	5	5	5	4	5	4	5	5	5	5	28	30	20	18	19	115	3	2	3	2
2	16	3	3	3	3	3	2	3	2	3	2	27	3	3	4	5	3	3	3	5	4	3	2	3	3	1	3	2	3	3	3	5	4	4	3	5	4	4	3	16	23	17	14	18	88	1	2	1	2
2	16	3	3	3	3	3	3	3	3	3	3	30	4	4	4	4	4	3	4	2	4	3	4	4	4	3	4	3	4	4	4	4	3	4	3	4	4	4	4	22	22	18	19	15	96	2	2	2	2
2	15	4	2	2	3	2	3	3	3	4	4	30	3	2	3	5	4	2	4	5	3	2	3	3	5	3	4	3	5	4	3	5	3	5	2	5	4	5	3	19	28	14	16	17	94	2	3	2	2
1	16	5	5	5	5	5	5	5	5	5	5	50	5	5	5	5	5	5	5	5	5	5	5	5	5	5	5	5	5	5	5	5	5	5	5	5	5	5	5	30	30	25	25	20	130	3	3	3	2
2	16	4	5	4	3	4	4	4	4	4	4	40	5	4	4	5	4	5	5	5	5	4	5	5	5	3	5	2	5	5	5	5	5	5	3	5	5	5	5	26	30	24	20	19	119	1	2	2	2
2	16	2	2	2	3	4	4	4	4	3	4	32	4	2	3	5	4	2	4	4	4	2	3	2	4	4	3	3	5	2	2	5	2	5	3	5	2	4	3	18	26	10	17	17	88	1	3	1	1
1	16	4	2	2	4	4	4	4	4	4	4	36	4	4	4	4	4	4	5	3	4	4	4	5	4	3	4	3	5	4	5	4	5	5	4	4	4	5	5	26	26	22	19	16	109	3	0	1	2
2	17	4	4	3	3	3	4	3	3	4	4	35	3	4	2	5	4	4	5	4	2	4	4	4	4	5	4	2	2	4	4	4	4	5	3	5	4	4	5	26	21	20	15	18	100	1	2	1	1
2	16	3	3	4	3	2	3	2	3	2	2	27	4	3	4	5	4	2	5	3	3	1	2	4	4	2	2	2	3	3	2	5	5	2	2	5	5	3	2	16	18	19	16	16	85	1	2	1	3
2	15	4	3	3	3	4	1	2	2	2	5	29	4	4	4	5	3	4	5	5	5	2	5	5	5	3	5	3	5	5	5	5	5	5	3	5	5	5	5	26	30	23	19	17	115	3	0	1	1
2	16	4	4	3	3	3	3	4	3	4	4	35	3	4	2	5	5	3	4	4	4	4	4	4	4	3	4	2	4	4	5	5	4	5	3	5	5	5	4	23	26	20	16	19	104	3	3	3	3
1	16	4	4	4	3	2	2	3	2	4	3	31	4	2	3	5	4	4	5	5	2	4	4	4	5	4	4	2	2	3	4	5	3	2	3	5	5	5	5	24	21	18	17	19	99	2	1	1	1
1	16	5	3	3	3	3	3	3	3	3	3	32	5	5	1	5	5	5	5	5	5	5	5	5	5	3	5	1	5	5	5	5	5	5	1	5	5	5	5	24	30	25	17	20	116	3	3	3	3
1	16	3	2	2	2	1	1	1	1	3	1	17	4	3	2	1	2	2	5	4	5	1	1	3	4	1	1	2	5	2	1	3	3	4	1	1	3	4	2	12	26	14	11	6	69	3	3	2	2
2	16	3	1	1	4	3	3	2	1	5	3	26	2	1	2	5	5	1	5	5	4	1	3	3	4	3	3	3	3	3	3	3	3	3	3	3	3	3	3	20	22	11	15	12	80	0	3	0	0
2	15	3	3	2	2	4	4	4	4	3	4	33	2	3	2	5	4	3	5	5	5	5	3	5	5	3	5	3	5	3	5	5	5	5	3	5	5	5	5	24	30	21	14	20	109	1	2	2	2
1	16	5	1	3	5	2	4	4	4	5	4	37	2	4	5	5	4	4	5	5	5	5	5	5	4	5	5	4	5	5	5	5	4	5	4	5	5	5	5	29	29	22	20	20	120	2	3	2	3
2	16	2	2	1	2	2	2	2	2	2	2	19	2	2	2	4	4	4	2	2	2	2	2	2	4	2	2	2	4	2	2	5	4	2	2	5	2	4	2	12	18	14	12	16	72	0	3	2	2
1	16	4	3	3	3	3	4	3	3	3	3	32	4	4	4	5	4	5	5	4	4	4	4	5	4	2	5	4	5	3	5	5	5	5	3	5	5	5	5	23	27	24	20	19	113	3	3	3	3
2	16	4	4	4	4	4	4	4	4	4	4	40	2	4	2	5	4	4	5	5	5	4	4	5	5	4	4	4	5	5	4	5	4	5	4	5	4	5	5	27	30	21	16	19	113	2	2	2	2
2	15	1	1	1	2	4	2	1	3	2	2	19	1	2	2	4	2	4	3	4	1	1	2	2	4	1	2	2	4	1	3	4	2	2	3	4	4	3	3	14	18	14	9	13	68	1	0	2	3
2	16	3	2	2	4	3	3	3	3	3	3	29	4	4	4	5	4	3	4	3	3	3	4	3	3	1	4	3	3	2	2	5	3	3	3	5	3	3	3	15	18	16	19	18	86	2	1	3	3
2	17	4	4	5	3	4	4	4	4	4	4	40	4	2	4	5	4	4	5	4	4	4	3	2	4	3	4	4	5	4	4	5	5	4	4	5	5	5	5	25	26	18	19	19	107	3	3	3	3
1	15	5	5	5	5	5	5	5	5	5	5	50	5	5	5	5	5	5	5	5	5	5	5	5	5	5	5	5	5	5	5	5	5	5	5	5	5	5	5	30	30	25	25	20	130	3	3	3	3
2	16	4	4	2	2	3	4	4	3	4	3	33	3	3	3	4	4	4	5	5	5	3	4	3	5	4	5	4	5	5	5	5	4	5	4	5	3	5	5	28	30	17	18	17	110	2	3	1	1
1	16	5	3	3	1	3	5	5	3	4	5	37	3	2	1	5	5	3	5	5	5	2	5	3	4	3	5	3	3	5	3	5	1	5	4	5	5	5	5	25	27	14	17	17	100	0	1	3	3
2	16	4	3	2	3	2	3	2	3	4	4	30	4	4	3	5	5	4	4	5	5	3	3	4	5	3	4	3	5	4	4	5	5	5	4	5	5	5	5	24	30	22	18	18	112	2	3	3	3
2	16	5	5	5	3	2	2	5	2	4	5	38	4	4	3	5	4	2	5	5	5	5	5	5	5	4	5	4	5	5	5	5	5	5	4	5	5	5	5	28	30	21	20	20	119	1	2	1	1
2	16	4	4	4	4	4	4	4	4	4	4	40	4	3	2	4	4	4	4	4	4	4	4	4	4	4	4	4	4	4	4	4	3	4	4	4	3	4	4	24	24	17	18	16	99	2	0	3	1
1	16	5	4	5	4	4	4	4	4	4	5	43	4	3	4	5	4	2	5	3	2	4	5	3	5	4	5	4	1	4	4	5	4	2	4	5	3	5	5	26	18	15	21	19	99	3	3	3	2
2	16	3	3	3	3	3	3	3	2	3	4	30	4	2	3	4	3	3	4	3	3	2	3	3	4	3	3	2	4	3	3	4	3	4	3	4	3	4	3	19	22	14	15	14	84	2	1	3	3
2	16	4	4	4	3	4	4	4	3	3	4	37	3	2	3	5	3	3	4	4	5	4	4	4	4	4	3	3	5	5	4	5	3	5	4	5	3	5	5	26	28	15	16	19	104	1	2	2	3
2	15	4	1	1	3	3	4	2	2	5	3	28	2	4	4	5	4	2	2	3	4	2	4	4	4	4	2	2	5	4	4	4	5	5	3	5	3	5	5	22	26	18	16	16	98	1	3	2	3
2	17	5	3	2	2	3	3	4	2	4	5	33	4	4	2	5	5	4	5	5	5	5	5	5	5	5	5	3	5	5	4	5	5	5	4	5	5	5	5	28	30	23	19	20	120	1	3	2	1
1	17	5	3	5	4	5	5	5	3	4	5	44	4	3	2	5	4	3	5	5	5	5	5	4	5	3	5	3	5	5	2	5	3	5	5	5	4	5	5	25	30	17	18	20	110	2	2	2	3
1	16	5	2	2	2	2	1	5	4	4	3	30	2	3	1	1	3	1	5	2	1	3	2	4	5	3	5	2	3	2	2	3	1	3	2	5	4	2	5	19	16	13	10	12	70	3	2	3	3
2	16	5	4	5	4	5	5	5	5	4	5	47	4	4	4	4	4	4	5	5	5	4	5	5	5	5	5	4	5	5	5	5	4	5	5	5	5	5	5	30	30	22	21	18	121	3	3	3	3
2	16	5	1	4	2	1	3	3	1	3	1	24	2	3	1	3	2	4	1	3	3	3	1	3	2	1	1	1	5	1	1	3	3	3	2	4	4	3	1	7	19	17	7	13	63	0	3	0	0
2	16	3	4	3	4	2	3	4	4	3	5	35	3	3	4	5	4	5	5	5	5	5	5	5	5	3	5	2	5	5	5	5	5	5	3	5	5	5	5	26	30	23	18	20	117	2	3	2	1
2	16	3	3	3	3	4	2	3	2	5	3	31	3	4	1	5	5	3	4	3	4	1	3	5	3	2	3	2	5	5	3	2	4	5	2	5	5	5	4	20	25	21	14	13	93	2	2	1	1
2	16	3	3	2	3	3	2	3	3	3	3	28	3	2	3	5	4	4	4	4	5	4	4	3	4	4	4	3	5	5	3	5	3	5	3	5	3	5	5	24	28	15	17	19	103	2	3	2	2
2	15	3	2	2	3	4	3	3	4	4	4	32	2	2	2	4	3	2	3	5	4	3	2	1	3	4	3	3	4	4	3	4	3	4	3	4	2	4	3	20	24	10	12	15	81	1	1	1	1
2	17	3	3	3	2	2	3	5	4	4	3	32	2	2	3	5	4	1	1	4	5	1	4	4	5	3	2	2	5	5	1	5	5	5	3	5	4	5	4	17	29	16	15	16	93	0	3	3	3
1	16	5	5	5	4	4	5	5	5	5	5	48	5	5	4	5	4	5	5	5	5	5	5	5	5	5	5	5	5	5	5	5	5	5	4	5	5	5	5	29	30	25	23	20	127	2	3	2	2
2	16	5	1	4	4	5	5	5	4	5	5	43	5	5	5	5	5	2	5	5	5	5	5	5	5	5	5	4	5	5	5	5	5	5	5	5	2	5	5	30	30	19	24	20	123	3	3	3	3
1	17	5	5	5	5	5	5	5	5	5	5	50	5	2	4	5	4	4	5	5	5	3	5	4	5	4	5	4	5	5	5	5	3	5	4	5	5	5	5	28	30	18	22	18	116	3	3	3	3
1	16	4	4	4	4	3	2	5	3	3	4	36	4	4	2	4	4	4	5	5	5	4	3	4	5	3	5	3	5	5	4	5	5	5	4	5	5	5	5	26	30	22	16	18	112	2	2	2	2
2	17	5	4	4	3	3	4	4	4	3	5	39	2	3	2	5	4	2	4	5	5	3	3	5	4	4	4	3	5	4	4	4	2	5	3	4	4	4	4	23	28	16	14	16	97	3	3	3	3
1	16	5	5	5	5	4	5	5	5	5	5	49	2	2	1	4	4	2	5	5	5	2	3	2	5	4	5	5	5	5	5	5	4	5	2	5	4	5	2	23	30	14	15	16	98	0	0	0	0
1	16	4	5	5	4	4	4	4	4	4	4	42	4	2	2	4	4	4	4	4	4	4	4	4	4	4	4	2	4	4	4	4	4	4	4	4	4	4	4	24	24	18	16	16	98	2	2	2	2
2	16	5	3	2	5	4	5	5	5	5	5	44	4	5	4	4	5	1	5	5	5	1	5	3	3	3	4	4	5	2	3	5	4	5	4	4	5	5	5	22	28	18	22	14	104	3	3	3	3
2	16	3	4	2	3	4	4	2	4	4	3	33	5	4	5	5	5	4	5	4	5	4	5	5	4	4	5	3	5	5	5	5	4	5	4	5	4	5	5	28	28	21	23	19	119	1	3	1	2
2	16	3	4	4	3	3	4	4	3	4	4	36	4	4	3	5	4	5	5	5	5	5	4	4	5	3	4	3	5	5	3	5	5	5	4	5	5	5	5	25	30	23	18	20	116	1	2	2	1
1	16	4	4	4	3	4	3	4	4	4	4	38	4	2	3	4	4	4	5	4	4	4	4	4	4	4	4	3	4	4	4	4	4	4	4	4	4	4	4	25	24	18	18	16	101	2	1	2	1
2	16	4	4	4	3	3	5	4	3	3	4	37	2	4	1	5	4	5	5	5	5	2	4	2	5	2	3	4	5	4	3	3	5	5	3	5	5	5	5	22	30	21	15	15	103	3	3	3	3
1	17	5	2	3	4	5	5	3	2	5	5	39	4	5	4	5	5	5	5	5	5	5	5	5	5	5	5	5	5	5	5	5	5	5	5	5	5	5	5	30	30	25	23	20	128	1	2	3	1
1	17	4	5	5	4	4	2	5	4	2	4	39	2	5	2	5	4	2	5	5	5	1	4	5	5	2	5	1	5	5	5	4	4	5	2	5	5	5	5	24	30	21	13	15	103	2	2	2	2
2	16	3	2	3	4	2	3	3	2	4	2	28	3	2	2	5	4	3	4	3	3	4	2	3	3	2	3	2	2	3	2	5	3	4	3	5	4	3	3	17	18	15	13	19	82	3	0	1	1
1	16	4	3	3	4	3	4	3	3	4	4	35	3	3	3	5	4	3	4	5	5	2	3	3	5	5	3	4	5	5	2	4	4	5	4	5	3	5	3	23	30	16	17	16	102	1	2	2	2
1	16	3	3	3	3	3	3	3	3	3	3	30	3	3	3	3	3	3	3	3	3	3	3	3	3	3	3	3	3	3	3	3	3	3	3	3	3	3	3	18	18	15	15	12	78	2	2	2	2
1	16	5	4	4	4	4	4	4	5	5	5	44	2	4	1	5	4	4	5	5	5	2	4	4	5	4	5	3	5	5	5	5	5	5	3	5	5	5	5	27	30	22	14	17	110	1	2	2	3
2	16	2	2	2	2	2	3	2	2	2	2	21	2	4	2	4	4	4	4	4	4	2	3	4	4	2	2	2	4	3	3	4	4	4	2	5	4	4	3	17	24	20	13	15	89	1	3	3	3
2	17	4	3	3	2	4	2	4	4	4	4	34	3	1	3	4	4	2	5	3	4	1	2	2	5	2	2	2	5	4	4	5	4	5	2	2	5	5	3	20	27	14	14	12	87	0	2	1	1
1	15	4	2	3	4	4	3	4	4	3	4	35	3	2	4	5	5	3	5	3	3	3	3	3	3	3	3	3	3	3	3	3	3	3	3	3	3	3	3	20	18	14	18	14	84	1	1	1	2
1	16	3	3	3	3	3	3	3	3	3	3	30	5	3	3	5	5	3	5	3	3	1	3	3	3	3	5	3	3	5	5	1	3	3	3	3	3	3	3	24	18	15	19	10	86	1	2	1	2
1	16	1	5	5	5	1	1	1	1	1	1	22	1	1	1	1	1	1	1	1	1	1	1	1	1	1	1	1	1	1	1	1	1	1	1	1	1	1	1	6	6	5	5	4	26	2	1	3	3
2	16	4	4	3	3	3	4	4	4	2	5	36	4	4	2	5	4	4	4	5	4	3	3	4	4	4	4	4	5	4	4	5	4	5	4	5	4	5	4	24	28	20	17	18	107	3	2	1	1
1	16	5	4	4	3	4	4	4	4	4	5	41	2	4	2	4	2	3	4	5	5	5	5	5	5	5	5	5	5	5	5	5	5	5	5	5	5	5	5	29	30	22	16	19	116	2	3	3	3
1	16	3	3	3	4	4	4	3	3	4	3	34	3	4	3	5	4	2	5	5	4	2	4	4	4	4	5	4	5	5	5	5	5	5	4	5	5	5	5	28	28	20	18	17	111	2	0	1	1
1	16	4	3	4	4	4	4	4	4	4	4	39	4	3	4	4	4	4	4	4	4	4	4	4	4	4	4	4	4	4	5	5	5	5	4	5	5	5	5	26	26	21	20	18	111	2	3	2	2
1	16	4	2	2	2	3	3	4	3	4	4	31	4	5	4	4	4	4	4	1	1	3	4	4	2	4	4	4	3	4	2	4	4	4	4	4	4	4	4	22	15	21	20	15	93	2	2	2	2
2	16	4	3	4	2	2	3	4	4	4	3	33	4	4	4	5	5	3	4	3	3	4	4	3	4	3	4	4	4	3	4	5	5	5	4	5	5	5	5	23	24	20	21	19	107	3	2	1	0
1	17	5	5	5	5	5	5	5	5	5	5	50	5	5	5	5	5	5	5	5	5	5	5	5	5	5	5	5	5	5	5	5	5	5	5	5	5	5	5	30	30	25	25	20	130	3	2	3	3
1	16	1	1	1	4	2	1	5	5	1	5	26	1	1	1	1	1	5	4	1	1	1	1	1	1	1	1	1	1	1	1	1	1	1	1	3	3	3	1	9	8	11	5	6	39	0	0	0	0
1	15	1	1	1	1	5	1	1	1	5	5	22	1	1	1	5	5	1	5	5	5	1	4	1	5	1	3	3	3	1	2	3	1	5	3	3	3	3	3	15	26	7	14	12	74	1	1	1	3
1	16	5	3	3	4	3	4	3	4	4	4	37	3	3	3	4	4	4	4	4	4	3	3	4	4	3	4	3	4	4	3	4	3	4	4	4	3	4	4	22	24	17	16	15	94	3	3	3	3
1	16	3	3	3	3	3	3	3	3	3	3	30	3	3	3	3	3	3	3	3	3	3	3	3	3	3	3	3	3	3	3	3	3	3	3	3	3	3	3	18	18	15	15	12	78	2	2	2	2
1	16	4	4	4	3	4	2	4	4	4	4	37	2	2	2	4	4	2	4	4	4	4	2	2	4	4	4	3	5	5	2	4	4	5	4	5	4	5	5	24	27	14	13	17	95	1	1	1	1
2	17	4	2	2	4	2	3	3	2	4	4	30	3	3	2	4	4	2	2	4	4	2	1	4	4	3	1	2	4	2	1	3	2	4	3	4	3	4	1	12	24	14	12	13	75	0	0	1	2
1	16	5	4	5	2	4	5	5	2	5	5	42	2	4	2	4	2	2	2	5	5	2	4	4	4	2	4	1	5	5	4	4	5	5	2	5	5	5	5	20	29	20	11	15	95	3	3	3	3
1	16	4	4	5	4	4	5	4	4	5	4	43	3	5	2	4	3	4	5	5	2	5	4	5	5	3	5	2	5	5	5	5	5	5	4	4	5	5	5	27	27	24	14	18	110	3	1	2	3
1	16	1	5	4	2	3	4	2	2	4	4	31	4	5	2	5	2	4	5	3	4	4	3	2	4	1	3	3	4	4	2	4	4	3	2	5	4	3	4	18	21	19	14	18	90	1	1	0	0
2	16	4	3	2	2	2	2	2	2	3	2	24	4	2	1	5	3	4	5	5	4	5	4	4	4	3	5	3	5	4	4	5	2	5	4	5	4	5	5	25	28	16	15	20	104	1	3	1	1
2	16	3	2	1	4	2	3	2	2	4	3	26	3	1	3	5	5	3	5	4	1	1	3	1	4	2	2	3	3	2	2	5	2	3	3	5	2	5	3	17	20	9	17	16	79	2	2	1	1
2	16	4	4	4	3	3	3	3	3	3	4	34	4	4	1	2	2	5	4	4	4	4	4	4	4	4	4	3	4	4	4	5	4	5	4	5	4	4	4	24	25	21	14	16	100	1	1	2	2
2	16	5	3	3	1	3	5	3	3	3	3	32	4	4	2	4	2	4	4	4	4	4	4	4	4	1	4	2	4	4	4	4	4	4	2	4	4	4	4	19	24	20	14	16	93	2	2	2	2
2	16	2	2	2	2	2	3	2	2	3	4	24	2	2	4	5	4	5	5	5	5	5	2	4	5	4	5	2	5	4	5	5	4	5	5	5	5	5	5	28	30	20	14	20	112	2	2	2	2
2	17	2	1	1	2	3	3	4	4	3	3	26	4	4	4	5	4	4	2	2	3	2	5	3	1	2	3	2	3	1	1	5	4	4	2	5	3	3	3	11	16	18	19	17	81	3	3	2	1
2	16	4	4	5	2	4	4	4	4	5	5	41	5	5	5	5	5	5	5	5	5	5	5	5	5	5	5	5	5	5	5	5	5	5	5	5	5	5	5	30	30	25	25	20	130	3	2	2	3
1	17	1	1	1	1	3	1	1	3	3	1	16	1	3	3	4	3	3	4	3	3	2	1	4	4	3	3	2	4	3	3	4	4	4	3	4	4	4	4	20	22	18	10	14	84	1	1	0	0
1	17	5	5	5	4	5	4	5	5	4	5	47	2	5	2	3	4	5	5	5	5	3	5	5	5	5	5	5	5	5	5	5	5	5	5	4	5	5	5	30	30	25	18	15	118	3	2	1	1
1	17	1	1	1	1	1	1	1	1	1	1	10	2	4	4	5	4	2	5	3	5	1	4	5	5	2	5	1	5	5	2	5	5	5	2	5	5	5	5	21	28	21	15	16	101	1	2	1	2
1	17	4	4	2	4	2	4	2	3	3	3	31	4	4	2	4	4	4	4	4	4	4	4	4	4	4	4	2	4	4	4	4	4	4	2	4	4	4	4	22	24	20	16	16	98	2	2	2	2
1	15	5	4	2	3	3	4	3	4	3	3	34	2	2	4	5	3	2	5	4	5	5	3	2	4	2	5	1	5	5	1	5	1	4	4	3	4	4	2	19	26	11	13	18	87	1	1	2	1
1	17	2	1	3	2	2	4	2	2	3	1	22	1	1	1	2	2	3	2	5	4	2	4	4	5	3	3	1	5	2	4	2	5	5	3	2	5	5	5	19	29	18	9	8	83	1	2	1	3
1	16	5	2	2	4	3	3	4	3	4	4	34	2	5	4	5	4	3	5	5	5	2	5	5	5	4	5	4	5	5	5	5	5	5	4	5	5	5	5	28	30	23	19	17	117	1	3	3	3
1	15	4	2	4	3	3	3	4	3	4	4	34	3	3	2	4	4	3	4	5	5	3	2	3	4	4	4	3	4	4	2	3	4	5	3	3	3	4	5	22	27	16	14	13	92	3	2	3	2
1	16	3	2	4	4	2	3	3	3	3	4	31	2	4	2	5	4	3	5	5	5	1	2	5	4	4	1	3	5	5	1	5	1	5	4	3	3	5	1	20	29	16	13	14	92	3	3	3	3
2	15	4	4	4	4	4	4	4	4	4	4	40	4	3	5	5	4	5	5	5	5	5	5	5	5	5	5	5	5	5	5	5	5	5	5	5	5	5	5	30	30	23	23	20	126	3	3	3	3
2	16	4	2	4	4	4	5	4	2	5	5	39	2	2	4	5	4	3	4	4	5	3	4	3	4	4	4	4	5	4	4	5	3	5	4	5	5	5	5	25	28	16	18	18	105	2	3	3	3
2	16	3	3	3	1	3	4	4	3	3	4	31	3	2	2	4	3	5	4	5	5	4	4	5	5	4	5	2	5	4	5	4	2	5	4	4	5	5	4	25	30	19	14	16	104	2	0	3	3
1	16	3	5	3	4	4	5	5	4	5	5	43	2	4	1	2	2	3	5	5	5	2	3	5	5	5	5	3	5	5	5	2	5	5	4	2	5	5	5	29	30	22	11	8	100	2	2	2	2
2	18	5	5	1	1	3	2	2	2	3	4	28	3	4	2	5	4	5	5	5	5	5	4	5	5	5	5	3	5	5	5	5	5	5	4	5	5	5	5	29	30	24	16	20	119	3	3	3	3
1	15	5	4	4	5	5	5	5	5	5	5	48	3	4	3	3	3	5	5	5	5	3	5	3	5	5	5	5	5	5	5	1	5	5	5	1	5	5	5	30	30	22	19	8	109	1	1	3	3
1	17	2	2	4	5	2	2	1	3	4	4	29	5	5	4	5	4	5	5	5	5	1	5	5	5	5	5	5	5	5	5	5	5	5	5	5	5	5	5	30	30	25	23	16	124	0	1	2	2
1	16	4	4	5	3	3	3	4	4	4	4	38	4	3	2	4	4	3	5	5	5	5	5	5	5	3	5	3	5	5	5	5	5	5	4	5	5	5	5	27	30	21	18	19	115	2	2	2	2
1	16	4	5	5	4	2	5	5	4	4	5	43	2	2	4	4	2	4	5	5	5	5	5	5	5	5	5	4	5	5	5	5	5	5	5	5	5	5	5	30	30	21	17	19	117	1	2	3	3
2	16	2	2	2	3	2	2	4	4	3	2	26	3	3	2	3	3	3	3	3	4	4	4	2	4	3	3	2	4	3	3	2	4	4	2	4	2	3	3	17	22	14	14	13	80	1	1	0	1
2	16	4	3	4	2	2	3	4	2	4	2	30	2	3	3	5	4	3	5	5	5	1	3	3	5	4	5	2	5	3	2	3	4	5	5	5	4	5	1	20	30	17	14	14	95	2	2	2	2
1	16	4	3	5	4	5	4	5	5	4	5	44	4	5	3	5	4	5	5	5	5	2	5	5	5	4	5	4	5	2	5	5	5	5	4	5	5	5	5	25	30	25	20	17	117	2	3	3	3
1	16	3	2	3	3	2	4	4	2	4	4	31	4	5	4	5	4	5	5	3	4	2	4	5	4	4	5	3	4	4	2	5	3	4	4	5	5	4	5	24	23	23	19	17	106	2	1	3	3
1	16	4	2	2	3	3	3	3	3	3	3	29	2	4	3	4	3	3	4	3	3	2	3	3	3	2	3	3	3	2	3	3	3	3	2	5	4	3	3	16	18	17	14	14	79	1	1	2	2
1	17	2	2	4	2	2	2	2	2	2	4	24	4	2	2	4	4	4	4	4	2	2	4	4	4	2	2	4	4	4	4	4	2	4	2	4	4	4	3	19	22	16	18	14	89	2	1	3	2
1	16	5	5	5	4	4	5	5	5	5	5	48	5	1	5	1	5	5	5	5	5	5	5	5	5	5	5	5	5	5	5	5	5	5	1	5	5	1	5	26	26	21	25	16	114	3	3	3	3
1	17	3	2	2	5	2	2	3	3	3	3	28	1	3	1	3	4	3	3	3	3	1	3	3	3	3	3	3	3	3	3	3	3	3	3	3	3	3	3	18	18	15	12	10	73	3	1	2	3
1	16	5	5	5	5	5	5	5	5	5	5	50	5	5	5	5	5	5	5	5	5	5	5	5	5	5	5	5	5	5	5	5	5	5	5	5	5	5	5	30	30	25	25	20	130	3	0	3	0
2	16	4	3	3	3	2	3	2	2	4	4	30	2	2	2	4	3	2	2	4	4	1	2	3	3	4	3	3	4	4	2	4	5	5	2	4	4	4	5	19	24	16	12	13	84	1	3	2	3
2	17	3	3	3	3	3	3	4	3	4	3	32	4	4	4	5	4	3	4	5	5	2	4	5	5	3	4	3	5	2	3	5	3	5	3	5	5	5	5	20	30	20	19	17	106	1	2	2	2
1	17	5	5	5	5	5	5	5	5	5	5	50	1	1	1	2	1	5	5	5	5	1	1	1	5	5	1	1	5	5	1	1	1	5	5	1	5	5	1	22	30	13	5	5	75	3	3	3	3
2	18	3	3	3	2	2	2	3	3	3	3	27	2	2	2	5	4	4	4	3	4	3	2	3	4	3	2	3	4	2	2	5	2	4	3	5	2	4	3	17	23	13	13	18	84	2	2	1	2
2	16	3	4	4	3	2	2	4	4	4	4	34	3	4	2	5	4	4	4	4	4	4	4	4	5	3	4	2	4	4	4	4	4	5	2	5	5	5	5	22	27	21	15	18	103	2	1	2	3
2	17	5	5	5	4	5	3	5	5	5	5	47	5	5	5	5	5	5	5	5	5	5	5	5	5	4	5	5	5	5	5	5	5	5	5	5	5	5	5	29	30	25	25	20	129	3	3	3	3
2	17	2	3	2	1	3	3	3	3	1	2	23	2	3	2	4	4	4	4	3	3	3	4	4	3	3	4	3	4	4	4	4	3	3	3	3	3	3	3	21	19	17	15	14	86	1	1	1	1
2	16	4	3	3	3	2	3	3	3	3	4	31	2	2	3	4	3	3	4	5	5	3	3	3	5	4	4	3	5	5	5	4	4	3	3	5	5	5	2	23	28	17	14	16	98	1	3	1	1
1	15	1	4	5	5	1	3	1	1	2	1	24	1	1	1	5	2	5	5	1	2	1	1	4	5	1	5	1	3	1	1	4	1	4	3	4	5	3	4	15	18	16	6	14	69	1	0	0	0
1	16	4	2	2	3	4	3	2	3	3	4	30	2	4	2	5	5	1	5	3	1	2	4	4	3	3	2	4	3	2	3	5	5	4	2	5	2	2	2	17	16	16	17	17	83	1	1	1	1
1	16	3	5	4	3	2	4	3	1	4	4	33	3	5	4	5	4	4	5	5	5	2	4	5	5	4	3	1	5	5	2	5	4	5	3	5	5	5	5	24	30	23	16	17	110	3	0	3	3
2	16	4	5	4	4	3	5	5	3	4	5	42	2	5	2	5	4	5	5	5	5	4	4	5	5	5	5	4	5	5	5	5	5	5	5	5	5	5	5	30	30	25	16	19	120	3	3	3	3
2	17	4	4	4	4	4	5	4	4	4	4	41	2	2	2	5	2	4	5	5	5	2	4	2	4	5	5	4	5	5	2	5	5	5	4	5	2	5	5	26	29	15	14	17	101	1	3	2	1
2	16	3	2	2	3	2	2	2	2	3	5	26	2	4	3	4	3	3	4	4	4	2	3	2	5	3	4	2	5	4	2	4	4	5	3	5	4	5	4	20	28	17	13	15	93	3	1	3	3
2	16	4	3	2	3	2	3	2	3	3	2	27	2	2	3	5	4	3	3	5	5	2	3	3	5	4	4	3	5	3	2	5	3	5	4	5	3	5	5	21	30	14	15	17	97	2	3	2	1
2	16	4	3	4	3	4	3	4	4	5	4	38	4	5	5	5	5	5	5	5	5	5	4	5	4	4	5	4	5	5	5	5	5	5	4	5	5	5	5	28	29	25	22	20	124	2	3	3	3
2	16	4	4	5	3	5	2	3	2	4	5	37	4	5	4	5	4	5	4	5	5	2	3	4	5	4	2	3	5	5	5	5	5	5	4	5	5	5	5	27	30	24	18	17	116	2	3	3	3
1	16	5	4	4	4	5	5	4	4	5	5	45	4	4	4	4	5	4	5	5	5	5	5	5	5	4	5	4	5	5	5	5	4	5	4	5	5	5	5	28	30	22	22	19	121	1	2	3	2
1	16	3	3	3	3	3	3	3	3	3	3	30	3	3	3	3	3	3	3	3	3	3	3	3	3	3	3	3	3	3	3	3	3	3	3	3	3	3	3	18	18	15	15	12	78	1	1	1	1
2	16	3	3	5	1	5	2	4	5	3	5	36	4	4	4	3	5	3	5	5	5	1	5	5	5	5	5	3	5	5	5	5	5	5	3	5	5	5	5	28	30	22	21	14	115	3	3	3	3
1	17	5	5	5	4	4	5	5	4	5	5	47	3	5	2	3	4	5	5	5	5	5	5	5	5	5	5	5	5	5	5	5	5	5	5	5	5	5	5	30	30	25	19	18	122	3	3	3	3
2	16	3	3	2	3	3	4	2	2	2	2	26	2	3	2	3	2	4	2	4	4	4	3	3	3	3	4	2	3	3	3	3	3	4	2	4	4	3	4	17	21	17	11	14	80	1	3	1	0
1	16	5	2	3	2	2	3	3	2	4	3	29	2	3	3	3	4	3	2	3	3	2	2	3	3	2	2	3	4	3	2	3	4	4	2	4	2	3	3	14	20	15	14	12	75	3	2	1	2
1	16	3	4	4	3	4	4	4	3	4	4	37	2	2	2	3	3	4	4	4	4	3	3	4	4	4	3	4	5	5	3	2	3	5	5	3	4	4	4	25	26	17	14	11	93	2	1	3	2
1	16	5	3	5	5	5	5	5	5	5	5	48	3	3	3	5	5	2	3	5	3	1	3	5	4	4	3	5	5	3	2	5	3	5	3	5	5	5	3	18	27	18	19	16	98	3	3	1	2
1	17	3	2	2	4	3	1	2	2	3	4	26	2	2	1	5	2	3	2	2	2	2	3	3	2	4	2	2	3	4	2	2	2	2	2	2	2	2	2	16	13	12	10	11	62	3	0	0	0
2	16	4	4	4	3	4	2	3	4	4	4	36	5	5	5	5	4	3	5	3	2	4	5	5	3	4	5	2	4	4	5	5	5	4	2	5	5	3	4	24	19	23	21	19	106	1	3	2	1
2	16	4	3	4	4	4	4	4	4	4	4	39	4	5	3	5	4	4	5	4	4	2	5	5	4	4	3	1	5	4	3	5	5	5	4	5	5	5	5	25	27	24	17	17	110	2	3	1	2
1	16	4	5	4	4	3	3	2	3	4	4	36	2	4	2	5	4	5	5	4	5	5	5	5	5	1	3	3	5	3	1	4	5	5	2	5	5	5	5	17	29	24	16	19	105	2	2	2	2
1	15	3	2	2	2	2	2	2	2	2	2	21	2	2	2	2	4	2	4	2	2	3	3	2	3	4	3	3	3	3	3	4	2	4	2	2	2	4	4	20	18	10	14	11	73	1	2	1	2
2	16	4	4	4	4	3	3	3	3	4	5	37	4	4	2	5	4	4	5	5	5	4	5	5	5	4	5	4	5	5	5	5	5	5	4	5	5	5	5	28	30	23	19	19	119	1	2	2	2
1	16	4	4	2	3	3	3	4	3	3	4	33	2	4	1	3	3	4	5	5	5	4	4	5	5	4	5	3	5	5	5	3	1	5	4	3	5	5	5	28	30	19	13	13	103	1	3	2	2
2	15	5	4	4	4	4	4	4	4	4	5	42	4	4	4	5	4	5	5	5	5	5	5	5	5	4	5	5	5	5	5	5	5	5	4	5	5	5	5	28	30	24	22	20	124	2	3	3	3
2	16	3	4	2	3	2	2	3	2	3	4	28	5	4	4	5	4	4	5	3	4	4	4	4	4	3	5	3	5	5	5	5	5	5	4	5	5	5	5	27	26	22	20	19	114	3	0	2	1
1	16	4	3	5	4	3	4	5	5	5	5	43	5	5	5	5	5	5	5	5	5	5	5	5	5	5	5	5	5	5	5	5	5	5	5	5	5	5	5	30	30	25	25	20	130	2	3	2	2
2	16	4	2	2	3	2	2	4	2	4	4	29	2	2	2	5	4	3	4	4	4	2	4	4	5	4	2	2	5	5	5	5	2	5	2	5	3	5	4	24	28	14	14	17	97	3	3	3	3
2	16	3	2	2	3	2	3	2	3	3	3	26	3	4	4	5	4	3	4	4	3	3	3	4	4	3	4	4	4	4	4	5	5	4	3	2	3	4	4	22	23	19	18	15	97	1	2	2	2
1	16	3	3	2	3	3	3	2	3	3	3	28	2	3	3	4	3	4	3	4	4	2	3	4	4	3	3	3	5	3	3	5	3	5	4	5	4	5	3	19	27	18	14	16	94	2	2	2	2
1	17	3	3	3	3	3	3	3	3	3	3	30	3	3	3	3	3	3	3	4	4	3	4	4	4	3	4	3	4	4	4	4	4	4	3	4	4	4	4	21	24	18	16	14	93	2	2	2	2
2	17	4	2	2	4	3	3	2	2	4	2	28	2	2	4	5	4	3	5	5	5	5	5	5	5	4	4	2	5	3	5	5	5	5	3	5	4	5	5	25	30	19	17	20	111	2	3	2	2
2	16	3	2	2	3	2	2	2	2	2	1	21	4	3	2	3	4	2	4	3	2	2	5	2	3	3	4	4	4	2	4	4	2	4	3	4	3	4	4	20	20	12	19	13	84	1	2	2	1
2	16	4	5	5	4	4	4	4	5	5	5	45	2	2	4	5	4	1	4	5	5	1	5	4	5	4	4	3	5	5	5	5	5	5	4	5	5	5	5	27	30	17	18	16	108	1	3	3	3
1	16	5	4	4	4	5	5	5	5	4	5	46	4	1	5	5	5	4	5	5	5	2	5	2	5	5	5	5	5	5	5	5	5	5	5	5	5	5	5	30	30	17	24	17	118	3	3	3	3
2	16	4	3	4	3	4	3	4	3	3	5	36	4	4	2	5	2	2	4	5	5	2	3	4	5	3	4	2	5	5	4	4	2	5	4	4	4	5	4	24	30	16	13	15	98	2	1	3	3
2	16	4	3	4	4	2	3	2	2	4	5	33	4	3	5	5	5	4	5	5	5	5	5	5	5	4	5	4	5	5	5	5	2	5	4	5	5	5	5	28	30	19	23	20	120	2	2	1	2
2	15	2	3	1	3	3	3	3	1	3	5	27	3	1	3	5	3	5	5	5	5	5	5	5	5	3	3	2	5	5	4	5	4	5	3	5	4	5	5	25	30	19	16	20	110	1	3	0	1
2	17	3	4	2	4	2	2	2	3	3	4	29	4	3	3	5	4	3	5	5	5	5	5	5	5	4	5	4	5	5	5	5	5	5	4	5	4	5	5	28	30	20	20	20	118	1	3	1	1
1	16	5	2	1	4	2	4	2	2	4	2	28	4	4	2	5	5	4	5	2	1	5	4	4	4	4	4	2	2	1	4	4	4	4	4	4	4	4	4	22	17	20	17	18	94	2	1	2	2
2	16	5	5	5	5	5	5	5	5	2	5	47	4	5	2	5	5	5	5	5	5	1	5	5	5	4	5	5	5	5	5	5	4	5	4	5	5	5	5	28	30	24	21	16	119	2	2	1	1
2	16	4	5	5	3	5	1	5	3	3	5	39	5	5	4	5	5	5	5	5	5	5	5	5	5	4	5	4	5	5	5	5	5	5	4	5	5	5	5	28	30	25	23	20	126	2	2	2	2
2	15	4	3	4	3	2	5	4	2	4	5	36	4	4	3	3	4	4	4	4	5	5	5	5	4	4	4	4	5	5	5	5	5	5	4	4	5	5	5	27	28	23	20	17	115	3	3	3	2
2	16	3	5	5	3	3	4	3	3	4	5	38	2	2	1	5	3	3	4	5	5	2	1	2	5	3	2	3	5	5	1	4	3	5	3	5	3	5	3	19	30	13	10	16	88	3	2	0	1
2	16	3	4	2	4	2	2	3	3	3	3	29	3	5	3	4	4	4	5	3	4	3	4	5	3	3	3	3	4	4	5	5	5	4	3	5	5	5	5	25	23	24	17	17	106	1	0	1	1
2	16	2	4	4	2	2	5	4	3	5	5	36	4	2	2	5	4	5	1	5	5	4	3	2	5	3	3	2	5	5	3	5	4	5	5	5	4	5	5	22	30	17	15	19	103	3	1	2	2
2	17	2	2	2	3	1	5	1	1	3	1	21	2	2	3	4	3	3	4	3	4	3	2	4	4	3	3	3	4	4	4	5	3	5	3	5	5	5	4	22	25	17	13	17	94	1	3	3	3
2	16	3	3	2	2	2	3	2	2	2	3	24	3	2	4	5	5	4	3	4	4	2	5	4	5	2	3	2	5	3	4	5	5	5	3	5	3	5	5	20	28	18	19	17	102	1	3	3	3
1	16	5	4	4	3	3	5	5	5	5	5	44	2	2	1	3	3	3	5	5	5	1	2	2	5	5	1	1	5	4	1	5	3	5	1	5	5	5	3	19	30	15	9	14	87	0	1	1	2
2	16	3	3	3	3	3	3	3	3	3	3	30	3	2	3	5	3	3	2	3	3	3	3	3	3	3	3	3	3	3	3	3	3	3	3	3	3	3	3	17	18	14	15	14	78	2	2	2	2
2	16	3	3	2	2	2	3	2	2	4	4	27	4	4	2	5	4	4	5	5	5	4	2	2	4	2	3	2	5	4	3	5	2	4	3	5	5	5	3	20	28	17	14	19	98	1	1	0	0
2	16	5	5	1	1	2	1	5	5	4	5	34	5	5	4	5	5	5	5	5	5	5	5	5	5	4	5	4	5	5	5	5	5	5	4	5	5	5	5	28	30	25	23	20	126	2	2	2	2
2	16	4	4	2	3	2	2	4	3	4	4	32	4	4	4	5	4	5	5	5	5	2	4	4	5	4	2	1	5	5	5	5	5	2	1	5	5	5	5	25	27	23	17	17	109	3	1	3	3
2	16	2	4	4	3	4	3	3	3	4	3	33	4	4	3	5	4	4	4	5	5	3	5	5	5	3	3	3	5	4	3	5	5	5	3	5	5	5	4	21	30	23	19	18	111	1	3	3	3
1	16	3	3	3	3	3	3	3	3	3	3	30	3	3	3	3	3	3	3	3	3	3	3	3	3	3	3	3	3	3	3	3	3	3	3	3	3	3	3	18	18	15	15	12	78	2	2	2	2
2	16	2	2	2	3	1	1	2	2	2	1	18	2	2	2	3	3	3	2	1	1	1	3	3	2	2	1	2	1	1	1	4	4	2	1	2	3	2	1	8	9	15	12	10	54	1	1	0	0
2	16	4	3	2	5	3	4	4	4	3	3	35	5	4	5	5	5	5	4	5	5	4	4	4	5	3	3	2	5	2	4	5	5	5	4	5	5	5	4	21	30	23	21	19	114	3	2	1	0
2	16	4	4	3	3	3	3	3	3	3	3	32	3	3	3	3	3	3	3	3	3	1	3	3	3	3	2	1	1	1	4	4	5	4	1	5	5	5	1	13	19	19	13	13	77	1	1	1	1
2	16	3	5	3	3	3	3	4	4	3	5	36	4	3	2	5	4	5	5	5	5	2	4	4	4	3	3	3	5	4	5	5	3	5	3	5	5	5	5	25	29	20	17	17	108	3	1	1	1
2	16	3	2	3	3	4	4	3	2	4	4	32	4	5	2	5	5	4	5	5	5	2	4	5	5	4	5	2	5	5	5	5	4	5	4	5	5	5	5	28	30	23	17	17	115	2	3	3	3
2	16	3	3	3	3	3	3	3	3	3	3	30	2	2	2	5	2	3	3	4	3	2	3	3	4	3	3	3	4	3	3	5	3	4	3	5	3	4	3	18	23	14	12	17	84	1	1	3	3
2	16	4	3	4	2	3	4	3	3	3	3	32	2	2	3	5	4	2	3	5	4	2	4	4	1	2	4	2	5	2	4	5	4	4	4	5	5	5	5	20	24	17	15	17	93	2	3	1	1
2	16	4	2	3	2	3	3	3	3	4	3	30	1	3	2	4	2	3	2	3	3	3	2	2	2	2	1	2	3	1	1	4	3	4	2	4	4	3	2	10	18	15	9	15	67	1	1	1	2
2	16	5	5	5	5	5	5	5	5	5	5	50	4	3	2	5	5	5	5	5	5	4	4	5	5	3	5	3	5	5	5	5	5	5	4	5	5	5	5	27	30	23	18	19	117	0	2	2	0
2	16	3	2	2	3	3	2	3	3	4	3	28	3	3	3	5	3	3	4	4	4	3	3	4	4	3	3	3	4	3	4	4	3	4	3	4	4	4	4	21	24	17	15	16	93	2	2	1	1
1	16	3	3	3	3	3	3	3	3	3	3	30	3	3	3	3	3	3	3	3	3	3	3	3	3	3	3	3	3	3	3	3	3	3	3	3	3	3	3	18	18	15	15	12	78	2	2	2	2
[truncated: 18 more columns]
